# Supplementary material for: Analogue modelling of the inversion of multiple extensional basins in foreland fold-and-thrust belts
Source: Copernicus journal article supplement (doi:10.5194/egusphere-2022-1014), 2022-10-12
Supplement: Supplementary file [file egusphere-2022-1014-RC1-supplement.pdf]

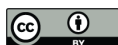

# Analogue modelling of the inversion of multiple extensional basins in foreland fold-and-thrust belts

Nicolás Molnar<sup>1</sup>, Susanne Buiter<sup>1,2</sup>

<sup>1</sup>Tectonics and Geodynamics, RWTH Aachen University, Aachen 52064, Germany

5 <sup>2</sup> Helmholtz Centre Potsdam - German Research Centre for Geosciences GFZ, Potsdam 14473, Germany

Correspondence to: Nicolás Molnar (nicolasemolnar@gmail.com)

## Abstract.

The presence of pre-existing rheological heterogeneities in the lithosphere plays a significant role during subsequent stages of deformation in essentially every geological process. Extensional basins located in foreland fold-and-thrust belts will alter the spatio-temporal evolution of its associated orogen. It remains unclear how far can horizontal stresses act and reactivate extensional structures, and it is difficult to interpret from the geological record how stresses were transferred across a heterogeneous crust. Here we examine the inversion of extensional basins in foreland fold-and-thrust belts by using three-dimensional analogue experiments that simulate first an extensional stage, followed by a shortening cycle. Our results show how extensional basins proximal to the orogenic front effectively localise deformation in the shape of thrusts and prevent stress transfer beyond their location. Basins that are located at large distances from the indenter also show evidence of mild inversion at early stages, but characterised only by basin infill contraction and uplift. When multiple extensional basins are present, although the degree and type of inversion will depend on their relative location and distance to the orogenic front, here we prove that the presence of additional extensional features in the vicinity of a basin can be a first order controlling factor in their reactivation history. We share additional insights of how a fold-and-thrust belt evolves once the extensional basins have been incorporated by the advancing wedge and we hope that comparisons with natural examples will shed light on some still unanswered questions related to the process of basin inversion in orogenic belts.

## 1 Introduction

The process in which compressional stresses induce basin uplift and reverse reactivation of normal faults in former extensional basins is commonly referred to as basin inversion (e.g. Cooper et al., 1989; Ziegler, 1989; Zwaan et al., 2022). The degree of inversion can range from mild which only partly nullifies the previous basin subsidence to (over-)complete which brings the former basin floor back to or above its regional equivalent level. Examples of mild inversion can be found in the North Sea (i.e. Nalpas et al. 1995; Scisciani et al. 2019), whereas an example of “over-inversion” can be found in the Permo-Triassic Doré basin that was strongly shortened during formation of the Swiss Alps (Pfiffner, 2009). The incorporation of extensional basins in an orogen will alter the spatio-temporal evolution of that orogen. Here the nature, size, geometry and rheology of the extensional basins can be expected to play a role.

Relationships between inversion structures in the foreland of orogens, sometimes located up to several hundreds of kilometres away, and compressional far-field stresses caused by the orogenic fronts have long been identified (Ziegler, 1989; 1998). Examples of compressional or transpressional deformation have been shown in the Alpine foreland up to 1300 km northwest of the Alpine thrust front (Ziegler, 1989; Nalpas et al., 1995; Kley, 2018), in the Laramides of North America 600 km to the east of the Cordilleran thrust front (Brewer and Turcotte, 1980; Ziegler, 1989; Cooper and Warren,

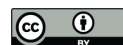

2020), and in the foreland of the Variscan and Alpine chains of northwestern Africa, 800 km to the south of the orogenic front (Ziegler, 1988; 1989; Guiraud & Bosworth, 1997). However, mechanisms of stress transfer across a heterogeneous crust and conditions that facilitate or hinder basin inversion in these settings remain unclear. Transmission of stresses in the lithosphere depends on the degree of interplate coupling (Lacombe and Bellahsen 2016; Delvaux, 2001) and on the rheological parameters (structural, thermal and/or compositional) that determine the spatial strength distribution within the lithosphere (Lacombe and Bellahsen, 2016; Ziegler 1998). It has been recognised that rifts with highly faulted crust are prone to easy inversion in collision-related intraplate deformation (e.g. Ziegler 1995; Angelier et al., 2021), but in how far horizontal stresses can act and reactivate pre-existing extensional structures, and to what extent, is still elusive (Bosworth and Tari, 2021).

There is a good understanding of how structural features in the metre to kilometre scale are indicators of basin inversion, such as normal faults that localise thrust-ramps or act as stress risers, thrust ramps that cross-cut earlier normal faults, folds and the uplift of synrift strata (e.g. Bonini et al., 2012; Scisciani, 2009; Granado et al., 2017). Nevertheless, when compressional deformation distributes across larger regions of extended crust, the analysis of multiple overprinted geological events becomes increasingly complex. The complexity lies in discerning between individual structural features and establishing their chronological order, even when there is good availability of sub-surface imaging or well data (Butler and Bond, 2021; Coward, 1994).

In this context, analogue modelling techniques, combined with modern monitoring and visualisation methods, can form a valuable approach for better understanding mechanisms of basin inversion as they have the advantage of quantifying deformation in time and space. Previous analogue modelling works have provided great insights on the spatio-temporal evolution of inverted basins, focussing on aspects such as the reactivation of listric normal faults (McClay, 1996), the influence of ductile layers during graben inversion (Brun and Nalpas, 1996), inversion of domino arrays (Buchanan and McClay, 1992; Jagger and McClay, 2018), the roles of basin orientation and basin fill (Panien et al., 2006a), pre-existing discontinuities that localise shortening (Sassi et al., 1993; Di Domenica et al., 2014), and thorough review papers on this topic are available (e.g. McClay, 1995; Bonini et al., 2012; Zwaan et al., 2022). Additional numerical modelling, seismic and field studies have also shown the influence of specific boundary conditions such as the importance of salt tectonics in thick- and thin-skinned basin inversion (Hansen et al., 2019), the effect of changes in stress direction over time (Phillips et al., 2017), or the influence of mechanically decoupled inverted systems (Krzywiec et al., 2022) and of the relative strength between inherited faults and syn-rift deposits (Granado and Ruh, 2019), among others.

# [Figure 1]

Historically, wide, narrow and core complex modes were proposed as end members of continental extension (Buck, 1991). In this work we emphasise wide rifting, which was originally suggested to be associated with previously thickened domains with a dominant ductile behaviour (England, 1983; Buck, 1991; Brun, 1999), but which may also occur as a result of strain migrating from zones of localised extension onto adjacent areas of undeformed crust (Buck, 1991). Pre-existing weaknesses in the lithosphere strongly influence the evolution of deformation in wide rifts by localizing strain in delimited areas, as interpreted for Mesozoic rifting in Western and Central Europe (e.g. Ziegler, 1989) or for Cretaceous rifting in Northern Africa (e.g. Guiraud and Maurin, 1992). Areas of distributed extension are commonly characterised by an alternation of horsts and grabens, with large-scale normal faults bordering basins filled with unconsolidated sediments (e.g. Brun, 1999). In this study we simulate wide extensional settings with the aim to (1) examine the inversion

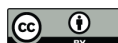

80 of extensional basins in foreland fold-and-thrust belts and (2) to examine the evolution of fold-and-thrust belts once these have incorporated the extensional basins. We compare our experimental results to natural observations where analogous conditions have been reported, such as the Carpathians in Central-Eastern Europe and the Atlas System in Northwest Africa. Our goal is to better understand how compressional stresses build up and are transferred from the orogenic wedge into a previously extended crust. We expect our results to become useful for recognizing basin inversion in the geological  
 85 record and to work as conceptual models for comparison with other natural examples.

## 2 Methodology

### 2.1 Experimental design

We employ a pull- and push-type apparatus with a computer controlled moving wall, a horizontal (slope = 0°) film-faced plywood basal board and 12 mm security-grade side glass walls (Fig. 2) (Gottron, 2018). We use only granular materials  
 90 with brittle behaviour to simulate upper crustal deformation. Overall model dimensions are 40 x 60 x 3 cm (width, length, height respectively). Experiments that incorporate extension are carried out in two stages. For the initial extensional stage, removable basal sheets are attached to the moving wall, following a technique employed in previous analogue modelling studies (e.g. Panien et al., 2006a; Granado et al., 2017; Jara et al., 2018; Yagupsky et al., 2008; Likerman et al., 2013). The basal plastic sheets are 0.4 mm thick and their borders are cut perpendicular to the moving wall (Fig. 2c). The wall  
 95 with the attached basal sheets is moved backward (pull) at a constant speed of 1 mm/min for 3 cm to create an extensional basin. differential relative movement between the basal sheet and the apparatus basal board creates a velocity discontinuity where normal faults are initiated. Within these 3 cm of displacement, the wall motion is paused every 1 cm to fill the interior of the depocenters to simulate syn-tectonic sedimentation (e.g. Panien et al., 2006a; Jara et al., 2018). At the end of extensional basin formation, the basal sheet is detached from the moving wall and fixed to the basal board.

100

### [Figure 2]

Since we evaluate the control that multiple extensional basins have on the evolution of orogenic wedges, we systematically vary the number of basins that are incorporated into the models. The number of times the extensional basin  
 105 procedure is repeated defines the number of basins to be created (Fig. 2d). In all models, the final extensional stage is followed by a shortening stage, imposed by the forward movement of the wall (push). Both stages of deformation are carried out at a velocity of 1 mm/min. Environmental conditions in the laboratory are controlled and kept within a range of  $22 \pm 1^\circ\text{C}$  for temperature and  $45 \pm 5\%$  for relative humidity for all experiments. Deformation is monitored using four Digital Single-Lens Reflex (DSLR) cameras that are simultaneously triggered, and pictures are taken every 30 seconds.  
 110 Surface and lateral strain, as well as topography, is then quantified using a high-resolution particle image velocimetry (PIV) and digital photogrammetry monitoring system (LaVision DaVis®). We calculate the differential strain and velocity fields at each time increment and progressive addition of these values are considered as cumulative values.

### 2.2 Materials and scaling

We use dry quartz sand to simulate crustal materials and microbeads to simulate weaker detachment layers at the base of  
 115 the sandpack. Sedimentary infill is also carried out with microbeads, coloured for visualisation purposes, to simulate less competent sedimentary rocks (e.g. Panien et al., 2006b). By using an approximate proportion of 0.1 g of dry powder pigment per 1000 g of microbeads, the mix only differs in colour but not in mechanical properties in comparison to the uncoloured microbeads used for the detachment layer. Both sand and microbeads obey the Mohr-Coulomb criterion

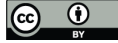

(Coulomb, 1773; Krantz, 1991; Vermeer, 1990; Teixell and Koyi, 2003), where a **time-independent rheological behaviour**

120 can be assumed. We performed shear box tests to obtain values for angle of internal friction and cohesion. Our values are similar to previously published results for the same materials (Klinkmüller et al., 2016). The employed quartz sand, prepared by Schlingmeier Quarzsand GmbH (Type G12T), has a bulk density of 1.53 g/cm<sup>3</sup>, grain size range between 0.1 and 0.4 mm, average grain size of 0.24 mm, an angle of internal peak friction of 33°, angle of reactivation of 30°, and a cohesion of 58 Pa. The microbeads, manufactured by Kuhmichel Abrasiv GmbH, have a bulk density of 1.51 g/cm<sup>3</sup>, grain  
125 size range between 100 and 200 µm, average grain size of 174 µm, an angle of internal peak friction of 28°, angle of reactivation of 24°, and a cohesion of 28 Pa. The Microbead-Plywood board interface friction angle is 19°. Granular materials are sifted using a purpose-built sifting device based on Maillot (2013), from a fixed height of 50 cm from the base of the apparatus (Fig. 2).

130 Analogue experiments must be scaled in terms of length, time, and forces to appropriately reproduce natural scenarios. We follow Hubbert (1937) and Ramberg (1981) to scale stress in materials with brittle behaviour, a standard approach in analogue modelling studies, following the relationship given by  $\sigma^* = \rho^* \cdot g^* \cdot l^*$ , where  $\sigma$ ,  $\rho$ ,  $g$ ,  $l$  are stress, density, gravity and length, respectively. Asterisks indicate they are scaling factors, which are calculated as the model (m) to nature (n) ratio:

135

$$\sigma^* = \frac{\sigma_m}{\sigma_n} = \frac{\rho_m}{\rho_n} \cdot \frac{g_m}{g_n} \cdot \frac{l_m}{l_n} \quad (1)$$

Our experiments are performed in a normal gravity field, therefore  $g_m / g_n = g^* = 1$ . We obtain our density scaling ratio by considering our quartz sand bulk density of ~1530 kg/m<sup>3</sup> and crustal rock densities of ~2700 kg/m<sup>3</sup> to obtain  $\rho_m / \rho_n$   
140  $= \rho^* = 0.567$ , and **we arbitrarily fix** a length relation of 1 cm = 5 km, obtaining a length scaling ratio  $l_m / l_n = l^* = 2 \times 10^{-6}$ . The stress ratio is then (Eq. 2),  $\sigma^* = 1.13 \times 10^{-6}$ , meaning that a cohesion of 58 Pa for quartz sand in the model corresponds to ~51 MPa in nature, and 28 Pa for microbeads corresponds to ~25 MPa in nature, falling within the range of ~20-110 MPa calculated with uniaxial compressive strength tests on natural rocks (Jaeger and Cook, 1976; Twiss and Moores, 1992; Handin, 1969). The angle of internal friction is dimensionless; therefore our model materials represent an  
145 appropriate analogue as 33° for quartz sand and 28° for microbeads fall within the range derived from experimental rock tests (Jaeger and Cook, 1976). Scaling parameters are summarised in Table 1.



| Material                      | Property                                         | Model                   | Nature                  |
|-------------------------------|--------------------------------------------------|-------------------------|-------------------------|
| Quartz sand                   | Bulk density                                     | ~1530 kg/m <sup>3</sup> | ~2700 kg/m <sup>3</sup> |
|                               | Grain size                                       | 100-400 µm              | -                       |
|                               | Internal friction angle   Peak<br>  Reactivation |                         | 33°                     |
|                               |                                                  |                         | 30°                     |
|                               | Cohesion                                         | 58 Pa                   | ~51 MPa                 |
| Microbeads                    | Bulk density                                     | ~1510 kg/m <sup>3</sup> | ~2665 kg/m <sup>3</sup> |
|                               | Grain size                                       | 100-200 µm              | -                       |
|                               | Internal friction angle   Peak<br>  Reactivation |                         | 28°                     |
|                               |                                                  |                         | 24°                     |
|                               | Cohesion                                         | 28 Pa                   | ~25 MPa                 |
| <b>Model scaling factors</b>  |                                                  |                         |                         |
| Length                        | $l^* = 2 \times 10^{-6}$                         | 1 cm                    | 5 km                    |
| Gravity field                 | $g^* = 1$                                        | 9.8 m/s <sup>2</sup>    | 9.8 m/s <sup>2</sup>    |
| Deformation rate <sup>^</sup> | -                                                | 6 cm/h                  | -                       |

<sup>^</sup> rheology of granular materials is strain-rate independent, scaling would be applicable only to viscous materials

**Table 1. Material properties and scaling parameters**

## 150 2.3 Experimental limitations

Analogue modelling has inherent limitations, mainly related to the difficulty of reproducing complex rheologies and simulating realistic temperature evolution of rocks, therefore representing a simplification of Nature (Koyi, 1997). In addition to this simplification, we have identified a number of limitations in our models. Sidewall friction in a push-type apparatus like ours is inevitable, and we therefore treat the internal side of the glass walls with a water repellent product (Rain X<sup>®</sup>) as it reduces the sand-glass interface friction (Cubas et al., 2013). Since the side contact area is relatively small due to the thin layering, the unwanted side effect can be considered negligible for this series of experiments. This is supported by a consideration of the ratio between the top surface area and the side surface area in our experiments which is 0.075 and thus below the value of 0.1 which Souloumiac et al. (2012) determined as the upper limit for negligible sidewall effects. The apparatus was designed to prevent material from sliding through the gap between the moving wall and the basal board during shortening. However, a very thin layer of microbeads still passes beneath the wall at early stages of deformation. As soon as crustal rupture is achieved, the entire thrust sheet is translated by the moving wall and no extra material slides through the gap. Although we recognise that the deformation imposed in our experiments strictly creates shear zones, we refer for ease of comparison to natural examples to areas of material failure in this study as faults and/or thrusts.

## 165 3. Analytical expectations

### 3.1 Mechanics of basin inversion

In terms of orientation of principal stresses in the upper crust, basin inversion can be generally described as a change from an extensional setting, where  $\sigma_1$  is vertical and  $\sigma_3$  is horizontal, to a compressional setting with  $\sigma_1$  horizontal and  $\sigma_3$  vertical. Assuming a Mohr-Coulomb criterion of failure for upper crustal rocks, the dip angle at which normal and reverse faults should form can be calculated when the cohesion and angle of internal friction values are known. Considering a rock analogue to the quartz sand employed in our experiments with an angle of internal friction of 33°, extension would result in the formation of normal faults at ~66° from the horizontal, while compression would lead to new thrusts forming

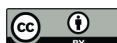

at 33° (Fig. 3d). The resulting unfavourable orientation of normal faults to reactivate under compressive stress has been the subject of numerous studies (i.e. Jaeger and Cook, 1976; Cooper et al., 1989; Bonini 2012; Zwaan 2022) and it is the main reason why complete fault reactivation remains a very challenging process to create by means of analogue and/or numerical modelling (e.g. Granado and Ruh, 2019). However, certain conditions such as obliquity of fault strike to  $\sigma_1$  (del Ventisette et al., 2006), weaker basin infill (Panien et al., 2006b), horizontal stress direction rotation (Ritter et al., 2016; Bonini et al., 2012) and type of post-rift sediments (Granado et al., 2017) have been tested in laboratory experiments and demonstrated to promote basin inversion and/or partial fault reactivation.

180

### [Figure 3]

In this study we present various models with a different arrangement of internal mechanical heterogeneities prior to the onset of shortening: a reference model with a homogeneous crust, and models with one, two and three extensional basins (Fig. 2e). Considering the materials' density, cohesion and angle of internal friction, Mohr diagrams representing the state of stress at the base of different sections of the models at the onset of shortening are plotted in Figure 3. With this theoretical framework as a basis, the following preliminary hypotheses can be drawn:

185

(1) Under conditions where layers have the same thickness and similar densities, the lower angle of internal friction of the microbeads will make the model sedimentary infill more prone to failure with the onset of shortening. Initial thrusts are expected to localise along the weaker extensional basins.

190

(2) Normal faults in the models have a theoretical dip angle of 66°. Even considering the lower reactivation values of internal friction, their reactivation during the shortening stage will be inhibited by their misorientation. Only a considerable rotation during shortening could favour fault reactivation, although observations from analogue models suggest that horizontal stress rotations would only be in the range of 5°-15° (Bonini et al., 2012, and references therein), and would therefore be insufficient.

195

(3) Vertical loading resulting from thickening in the sand wedge leads to strengthening of the sand pack as  $\sigma_3$  increases (Fig. 3d). With ongoing shortening, the thicker sand pile will require an increase in  $\sigma_1$  to maintain the same shortening rate (Fig. 3e). This process may favour the reactivation of normal faults due to protracted compression within the basin or may lead to the formation of new thrusts beyond the extensional basin, the latter event being subject to the status of wedge stability (Sect. 3.2).

200

### 3.2 Critical taper theory

205

During shortening, the extensional basins are incorporated in a thrust wedge, which has heterogeneous material properties caused by the mixing of the microbeads of the basin fill with quartz sand. Critical taper theory (Dahlen, 1984; 1990) predicts a lower taper angle of 6.2° (unsoftened) to 7.2° (softened) for a pure quartz sand wedge overlying a thin microbeads basal layer. Theoretical dip values of forward verging thrusts are ~20° and steeper back thrusts dip at ~37° (Dahlen, 1990). The critical taper angle (which equals surface slope for our horizontal base experiments) for a pure microbeads wedge is 7.9° (unsoftened) to 9.7° (softened). For our wedges, surface slopes between 6.2° to 9.7° can thus be argued to be valid values, where we would expect a tendency towards the higher values due to the mixing of microbeads into the sand.

210



215 As thrust sheets are emplaced over the extensional basins during shortening the resulting strength increase caused by the increase in  $\sigma_3$  may be significant enough to keep the system stresses in a state such that the localisation of new thrusts would be determined not only by the internal rheological heterogeneities, but also by the need of the wedge to reach a critical taper value. New frontal thrusts then develop to decrease the taper angle.

#### 4 Results

220 We carried out 8 experiments with identical handling procedures and under similar temperature and humidity conditions, using the same quartz sand, pigment, and microbeads (Table 2). Here we present the results of the 5 experiments with different initial conditions; three selected experiments were run twice to check for reproducibility. Two experiments, **REF-NB** (no basal sheet) and **REF-WB** (with basal sheet) examine shortening of a homogeneous layering, without extension, with the objective of having two reference shortening experiments to compare our basin inversion experiments  
 225 against. The basin inversion experiments (**1B**, **2B** and **3B**) include an extensional phase forming one, two or three extensional basins, respectively. For description purposes, a terminology based on the analogy with the location of the foreland and hinterland in fold-and-thrust belts is used, and the extensional basins are called proximal, central and distal based on their proximity to the moving wall (Fig. 2e).

230 **Table 2. List of the performed analogue models**

| Experiment ID | Basins | Description                                               |
|---------------|--------|-----------------------------------------------------------|
| REF-NB        | -      | Reference model, no basal sheets                          |
| REF-WB        | -      | Reference model, with basal sheets                        |
| 1B            | 1      | Basin located at 24.5 cm from moving wall                 |
| 2B            | 2      | Basins located at 19.5 and 24.5 cm from moving wall       |
| 3B            | 3      | Basins located at 9.5, 19.5, and 24.5 cm from moving wall |

#### 4.1 Reference experiments

Experiment REF-NB (Reference experiment, no basal sheets) consists of a 5 mm thick microbead layer overlain by a 25 mm thick cover of quartz sand, with interbedded coloured horizontal layers that act as passive markers. No basal plastic  
 235 sheets are employed in this model. Results of experiment REF-NB show a typical piggy-back deformation style, with thrust sheets developing in sequence and being gradually transported towards the foreland. Shortening is accommodated first by a pop-up structure consisting of a forward and back thrust rooting from the basal detachment layer at 2.3 cm from the moving wall (T1 in Fig. 4a). Activity in the back thrust decreases and strain is then only accommodated by the frontal thrust T1, until a new pop-up structure forms, at 12.9 cm from the moving wall (T2 in Fig. 4a). The entire thrust sheet is  
 240 translated towards the foreland until a third pop-up structure develops, after 16 cm of displacement (T3 in Fig. 4a). After 20 cm of displacement, the measured wedge taper angle is 8.5° (Fig. 4a).

[Figure 4]

245 Experiment REF-WB (Reference experiment, with basal sheets) was designed to create the exact same initial conditions as experiment REF-NB, with the only addition of including plastic basal sheets fixed to the apparatus base, with vertical sub-millimetric steps -perpendicular to the shortening direction- located at 9.5, 19.5 and 24.5 cm from the initial position of the moving wall (Fig. 4b). The plastic sheets are used in subsequent experiments to create extensional basins and



remain in a passive role during the shortening phase. We here test their potential influence during shortening. Experiment  
 250 REF-WB develops a pop-up structure almost immediately after the initiation of the wall movement (T1 in Fig. 4b), as  
 observed in experiment REF-NB. However, in REF-WB the pop-up structure forms at 7 cm from the moving wall, which  
 is closer to the edge of the first basal sheet step, **meaning that its associated basal velocity discontinuity could play a role  
 in determining the location of the first thrust sheet in the accretionary wedge evolution.** After approximately 7.5 cm of  
 displacement, the initial pop-up structure is progressively abandoned and a new frontal thrust forms towards the foreland,  
 255 rooting from the basal detachment layer at 14 cm from the moving wall (T2 in Fig. 4b). In this case, the location of the  
 frontal thrust and its conjugate back thrust is not aligned with one of the basal sheet steps (Fig. 4b). Most of the shortening  
 is accommodated by the second frontal thrust until the system reaches ~17 cm of displacement. At this point, a new pop-  
 up structure develops, rooting from the basal detachment layer at 20.5 cm from the moving wall (T3 in Fig. 4b). The new  
 frontal thrust localises most of the wedge deformation until the final stages of the experiment (Fig. 4b). After 20 cm of  
 260 displacement, the measured wedge taper angle is  $9.3^\circ$  (Fig. 4b)

The overall evolution of the accretionary wedge in REF-WB is similar to experiment REF-NB. Both experiments were  
 run twice, showing little variability in terms of pop-up structure formation and thrust localisation. The velocity  
 discontinuities formed by the sub-millimetric geometrical steps of the basal sheets only influence the model in early  
 265 stages, defining the onset of the first thrusts. However, the fact that the sheet edges are not aligned with the subsequent  
 floor thrusts allows us to assume that their effect in the evolution of the modelled accretionary wedge is negligible for the  
 purpose of our study.

#### 4.2 Experiment 1B: One extensional basin

Experiment 1B consists of two stages. An initial stage of 3 cm extension in which an extensional basin with border faults  
 270 located between 24.5 and 27.5 cm from the wall (measured along the base) is created, followed by a stage of 20 cm of  
 compressional displacement. Shortly after the initiation of shortening, frontal and back thrusts develop at approximately  
 5 cm from the moving wall (T1 in Fig. 5). During the first 6 mm of displacement, before the onset of the first frontal  
 thrust, the distal extensional basin shows internal horizontal compression, reaching peak values of up to 16% of  
 cumulative strain (7% in average) but without fault reactivation or the formation of new thrusts. No further internal  
 275 deformation of the basin is observed between 0.6 and 4 cm shortening.

The initial thrust sheet is transported towards the foreland and after 5 cm of total displacement, strain accommodation is  
 partitioned, and stress builds up again in the extensional basin. Subsequently, the initial forward thrust is progressively  
 abandoned, and strain localisation is transferred entirely near the pre-existing extensional basin (T2 in Fig. 5). A new  
 280 forward thrust forms along the limit between the faulted blocks in the foreland side and the weak microbead depocenter  
 filling, without reactivating the extensional border faults. The extensional faults in the hinterland side are cross-cut and  
 the thrust sheet propagates towards the foreland, above the pre-rift sediments (Fig. 5; 8 cm displacement). With ongoing  
 deformation, no further deformation is observed beyond the extensional basin and the wedge grows in height through the  
 development of three new back thrusts that form progressively towards the location of the wall. After 20 cm of  
 285 displacement, a wedge taper angle cannot be accurately estimated, as the wedge is in transition to a critical taper, and two  
 distinctive wedge fronts can be established at  $27.7^\circ$  (determined by the angle of repose of the microbeads) and  $3.7^\circ$  in the  
 more planar, higher section (Fig. 5).

[Figure 5]





290

#### 4.3 Experiment 2B: Two extensional basins

The 3 cm extensional phase for Experiment 2B leads to the formation of a distal basin with border faults located between 24.5 and 27.5 cm from the wall (measured along the base) and a central basin with border faults located between 19.5 and 22.5 cm from the wall. Initial compressional deformation is accommodated by the development of a pop-up structure, forming at 14.3 cm from the wall, aligned with the pre-existing extensional basin located closer to the hinterland (T1 in Fig. 6). The frontal thrust cross-cuts the border faults on the hinterland side and progressively transports the basin fill over the pre-rift sandpack, towards the foreland. After 2.3 cm of displacement, a new forward thrust develops in the proximity of the wall (T2 in Fig. 6). As observed in Experiment 1B, the early development of a thrust sheet located relatively further away from the wall than in the reference models, causes the wedge to grow in a subcritical, unstable manner (Fig. 6; 4 cm displacement). Internal deformation of the wedge is therefore controlled by a new forward thrust forming at 2.4 cm from the moving wall (T2). This out-of-sequence thrust accommodates shortening for another 2.5 cm of displacement, when the frontal thrust T1, located along the weak graben fill, is reactivated (Fig. 6; 8 cm displacement). PIV analysis at 8 cm of displacement indicates no normal fault reactivation, but the frontal thrust does show a strong deflection of its dip angle, from 20° at the base to 37° when it interacts with the extensional basin (Fig. 6; 8 cm displacement). Coevally, a series of back thrusts become active in the hinterland side of the thrust sheet as the wedge continues to advance. At later stages, the frontal thrust located along the central basin and its conjugate back thrust decrease their activity and strain localisation is progressively transferred to the distal basin (Fig. 6; 12 cm displacement). Before the onset of a new pop-up structure in the distal basin, cumulative strain within the synrift strata reached values of up to 24%. After 12 cm of total displacement, shortening in the foreland is accommodated first by a back thrust aligned with the extensional basin border faults, later replaced by the formation of a new forward thrust (T3 in Fig. 6). At 16 cm of displacement, the wedge continues to grow with most of the strain localised along the two forward thrusts and steeply dipping back thrusts (Fig. 6; 16 cm displacement). Final stages of deformation are characterised by a new pop-up structure forming in the foreland (T4 in Fig. 6). The wedge taper angle after 20 cm of shortening is 9.7° (Fig. 6).

315

[Figure 6]

#### 4.4 Experiment 3B: Three extensional basins

Experiment 3B is carried out following the same procedure as Experiments 1B and 2B, but now creating three extensional basins before the onset of shortening. The extensional phase for this experiment results in the first basin located between 28.5 and 31.5 cm from the moving wall, the second basin between 19.5 and 22.5 cm from the moving wall, and the third and last basin located between 9.5 and 12.5 cm from the moving wall (all measured along the base). Early compressional stages are characterised by the formation of a forward thrust, with its location being controlled by the weak basin fill of the basin, cross-cutting the extensional border faults located on the side of the moving wall (T1 in Fig. 7). This forward thrust is followed by the formation of a back thrust, both rooting from the basal detachment layer at 5.8 cm from the moving wall. Close inspection of PIV data shows that the interior of the proximal extensional basin localises up to 20 % of strain before the onset of the pop-up structure. After 6.5 cm of displacement, strain is partitioned and progressively transferred to the central extensional basin, where a new forward thrust develops, aligned with the interface between the rifted blocks and the weak sedimentary infill, as occurred in earlier stages of this experiment (T2 in Fig. 7). No clear reactivation of border faults can be detected in this process, although the high angle (49°) of the associated back thrust could be associated with the partial reactivation of the hinterland border faults. The central basin shows horizontal



330 compression and a partial uplift of 2.2 mm prior to crustal failure. Cumulative strain is calculated to reach values of up to 26% within the basin before the onset of new thrusts.

Strain localisation along this central basin is short lived and a new forward thrust develops at 16.2 cm from the moving wall, with its localisation being determined by the existence of the distal basin (T3 in Fig. 7). The new frontal thrust becomes the most active structure at this stage of the accretionary wedge evolution. Two new back thrusts form and show

335 a noticeable deflection in their dipping angle when interacting with the uplifted central basin. After 16 cm of displacement, the entire sedimentary fill of the first basin is transported past the frontal thrust tip point. At this stage, internal deformation of the wedge is accommodated by the frontal thrust T3 and its conjugate back thrust, as well as by a forward thrust rooting from the base of the wall and aligned with the location of the weak remobilised sediments in the interior of the wedge (Fig. 7; 16 cm displacement). After 20 cm of shortening, strain is localised only along the frontal thrust and a back thrust

340 that transects the entire wedge, with a variable dip angle of  $39^\circ$  in its lower section and  $60^\circ$  in its upper section (Fig. 7; 20cm displacement). The measured wedge taper angle is averaged to  $10.7^\circ$ , although two wedge fronts with different slopes can alternatively be measured as  $28^\circ$  and  $5.5^\circ$  (Fig. 7).

[Figure 7]

## 345 5 Discussion

### 5.1 Overall evolution of the experiments

Certain features can be observed across all experiments with pre-existing extensional basins. Independent of the position of the graben (proximal, central or distal), detailed analysis shows that normal fault reactivation is not the main mechanism for basin inversion during shortening stages. The change from extension to shortening is instead characterised by a partial

350 inversion that can be outlined in three stages:

- (1) Horizontal stresses are transferred across the quartz sand (analogous to stronger crust), resulting in the shortening of the microbeads (analogous to weak sedimentary infill) and an associated upward bulging. Cumulative strain localising in the interior of the basins prior to the development of forward thrusts range from 5-26%. When multiple extensional basins are present, the proximal basin absorbs most of the stress transferred through the quartz sand as it is closest to the wedge
- 355 (2) Thrusts develop in the microbeads and produce the partial inversion of the basin, resulting in the asymmetric dome-shaped deformation of the microbeads (syn-rift growth strata). In all cases, the thrust producing the internal deformation of the basin is a frontal thrust, except for the distal basin in EXP2B, where the basin uplift is accommodated by both a frontal thrust and a back thrust aligned with the basin border faults instead (Fig. 6; 12 cm displacement).
- 360 (3) The mechanism of shortening accommodation finally ends with the development of a new frontal thrust, located further away from the moving wall. This mechanism is the result of two processes combined: (1) the prograding wedge pushes new material on top of the extensional basin to the point that the locally increased crustal thickness makes it rheologically stronger (through the increase in vertical stress), thereby making the region towards the foreland relatively weaker, and (2) the orogenic wedge is transitioning towards its critical taper angle and needs
- 365 to grow forward to decrease its angle and remain in the stable field, following critical taper theory.

Beyond these similarities in the general mechanism of (partial) basin inversion, there are important differences in the spatio-temporal evolution of deformation and thrust sequencing as a function of the number of extensional basins:



370

EXP1B shows the largest thrust spacing among the experiments, with the first pop-up structure developing in the vicinity of the moving wall (Fig. 5; 2 cm displacement), followed by the transfer of horizontal stresses onto the pre-existing extensional basin, located ~17 cm beyond the basal detachment of the initial frontal thrust (Fig. 5; 8 cm displacement). This experiment shows the maximum amount of strain accumulation in the extensional basin prior to its failure by shortening and represents the distal extensional basin with the earliest evidence of a certain degree of inversion. The emplacement of frontal thrusts differs from the reference experiments as in EXP1B they are conditioned by the location of the extensional basin (cf. Fig. 4 and 5). The distal extensional basin acts as an efficient localiser that takes up stress and no thrusts develop beyond its position throughout the entire experiment.

375

EXP2B is the only experiment of this series that developed out-of-sequence frontal thrusts. The first frontal thrust localised along the central extensional basin, before strain was accommodated by a pop-up structure in the vicinity of the wall (Fig. 6; 4 cm displacement). Thrust spacing closely resembles that of the reference experiments, although they follow a different chronological order. Contrarily to what is observed in the other experiments, the distal graben normal faults that are crosscut are those located at the foreland side of the basin, resulting in an oppositely verging uplift of the sedimentary infill (Fig. 6; 16 cm displacement)

385

EXP3B evolution is characterised by in-sequence thrusts that localise along each of the extensional basins (Fig. 7). The main difference with EXP1B and EXP2B is that the inversion of the central basin is more complex: early stages of deformation produce partial uplift, but it is short lived as prograding sediments from the wedge result in an overburden that makes the basin rheologically stronger and deformation is soon transferred to the distal basin (Fig. 7; 12 cm displacement). As in EXP1B, no further shortening structures are observed beyond the position of the distal basin (Fig. 7; 20 cm displacement).

390

## [Figure 8]

### 395 5.2 Comparison to critical taper theory

Fault dip angles in the analogue experiments average 26°–32° for the forward thrusts and 31°–46° for the backthrusts. The forward thrusts are thus somewhat shallower than the theoretical dip angle of 33° for reverse faults in undeformed sand, whereas the backthrusts are mainly steeper. As  $\sigma_1$  is rotated in thrust wedges, the theoretical dip angles become (section 3.2) 20° for forward thrusts and ~37° for backthrusts. The measured forward thrusts are thus steeper than the theoretical value for mature wedges, whereas the backthrusts could be argued to fit fairly well. However, in our opinion the thrust dip measurements have limited validity as they are manifestation of internal wedge deformation during its transition to become critical.

400

When comparing the experiments in which basins are incorporated in the thrust wedge to the reference experiments without basins, we find a perceptible effect of the pre-existing extensional basins on the final taper angle of the wedge: the taper angle increases. The reference experiments with a homogeneous quartz sand layer had measured taper angles of 8.5° and 9.3° after 20 cm of shortening, which are somewhat higher than the predicted values of 6.2°–7.2°. Measured values for experiments 2B and 3B values are higher again, at 9.7° and 10.7°, respectively (Fig. 8). In experiments 1B and 3B the shape of the advancing wedge is irregular, making it harder to draw a best-fit line that determines the taper angle (Figs. 8c and 8d). In these cases, the protracted localisation of shortening along the distal extensional basin results in greater accumulation of scraped-off and slope materials in the frontal section. As a result, the frontal slope is determined

410

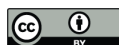

by the angle of repose of the quartz sand and microbeads mix. When comparing experiments 1B, 2B and 3B after the same amount of shortening (Fig. 8), experiment 2B displays the lowest wedge taper angle, as it formed a new frontal thrust at a slightly earlier stage of deformation (Fig. 8c-d). However, the overall temporal evolution of the wedge taper angle during shortening is similar for the experiments with a previously extended crust. Results point towards an increase  
415 of the taper angle in comparison to wedges with a homogenous crust (cf. Figs. 8a-b and 8c-d). This agrees with our predictions (Sect. 3.2) as the inclusion of the weaker microbeads of the basin fill is expected to increase the taper angle.

### 5.3 Mechanisms of basin inversion in the experiments

In terms of local structures and transient mechanisms of strain accommodation, we can classify partial inversion in the models into three stages: basin shortening and uplift, thrust localisation and reactivation, and deformation relocalisation  
420 due to changes in brittle strength.

#### 5.3.1 Basin shortening and uplift

Early stages are generally manifested by the lateral movement of the **crustal** section between the moving wall and the most proximal extensional basin (Fig. 9). This crustal section is rheologically stronger than the extensional basin infill, **therefore stress is transferred along the crust** and shortening is absorbed by the unconsolidated sediments of the basin.  
425 This produces an early compaction and subsequent upward bulging of the basin fill, prior to the failure of the crust in the form of a thrust (Fig. 9).

#### [Figure 9]

430 During this initial stage, there is no displacement observed distalward from the basin for relatively long periods of time, meaning that extensional basins act as efficient feature to localise stress and prevent further transfer within the crust (Fig. 9; central panels). However, in the case of EXP1B, where the distance between the moving wall and the extensional basin is relatively higher (28.5 cm vs. 19.5 and 9.5), shortening is initially manifested as a classic pop-up structure near the moving wall, preceding the basin fill compaction stage. This observation indicates that, in conditions analogous to our  
435 models, there may be a distance threshold of how much compressional stresses can be transferred from the orogenic front laterally far into the crust.

An uplift of up to ~9% of its initial thickness and a horizontal contraction of up to ~8% of its initial width is observed among the extensional basins in all models (Fig. 9). PIV analysis shows that up to ~25% of strain can be accumulated in  
440 the interior of the extensional basins before any type of faulting is manifested. These observations are in line with previous analogue modelling results (Panien et al., 2006a) and field studies (Chadwick **et al.**, 2003), where it has been identified that inversion of extensional basins initiates by bulk shortening of the graben-fill, localised minor **reverse faulting**, and subsequent regional upwarp (Fig. 9).

#### 5.3.2 Thrust localisation and reactivation

445 After the initial stage of stress build up in the interior of the basins, crustal failure -identified as such when incremental strain values are over 1%- is manifested as forward verging thrusts. Except for the early pop-up structure formed in the vicinity of the moving wall in EXP1B (Fig. 5; 2 cm displacement), all initial frontal thrusts are localised along the pre-existing extensional basins. These results are in line with early observations of how extant hinterland-dipping normal faults favour the development of foreland-directed thrusts (Cooper et al., 1989). Thrusts that crosscut the basin have dip



450 angles in the range of 20°-38°. When analysed in detail, examples of EXP3B and EXP2B show that dip angle variations within the thrust are associated with the location of the pre-existing normal faults (Figs. 10b and 10d), without reactivation *sensu stricto* due to their misorientation. The only significant difference in this process is observed in the distal basin of EXP2B, where the weak sedimentary infill is determining the position of the back thrust instead of the frontal thrust. A forward verging thrust forms that cuts through the homogenous crust (Fig. 10d).

455

#### [Figure 10]

Due to the misorientation of normal faults, their reactivation and inversion does not occur in any of the basins, with one potential exception in the distal basin of EXP2B (Figs. 10d-f). Prior to the formation of the pop-up structure that lifts the basin up, strain builds up along the middle and lower part of both border faults (Fig. 10f; 117 min). However, the degree of strain localisation is too low and short lived for normal fault reactivation, and two frontal thrusts form instead (Fig. 10f; 121 min). When this happens, normal faults are cross-cut as in the rest of the extensional basins located at the foreland of the modelled orogenic wedges.

### 5.3.3 Variations in brittle strength

465 Our modelling outcomes allow the identification of the chronological order in which crustal thickening and vertical loading may result in locally stronger areas of the crust. The rheological heterogeneities formed by the basins play an important role in determining how long lived each of the frontal and back thrusts are. Prior to thrust sheet translation and the associated vertical load, the weakest area is always the interior of the basins (see Sect. 4), where shortening is expected to localise. Thrusts effectively form in the proximity of the basin and cross-cut border faults. With ongoing deformation and transport of material on top of the extensional basins, the previously weaker interior becomes stronger due to an increase in the vertical principal stress  $\sigma_3$  (Fig. 3e). At this point, strain localisation and overall evolution of deformation becomes a trade-off between (a) the location of the rheologically weaker sections of the crust and, (b) the need of the wedge to reach the critical point predicted by critical taper theory.

In EXP2B, before reaching 12 cm of total displacement, an early frontal thrust that localised along the central extensional basin is active, while new frontal and back thrusts start developing in the vicinity of the distal extensional basin (Fig. 11a; 117 mm displacement). Initially, the new back thrust seems to accommodate most shortening in the new orogenic front. However, the early-formed thrust sheet continues to transport material on top of the basin until the vertical load is sufficiently high to hinder the partial basin inversion (Fig. 11a; 127 mm displacement). Strain subsequently jumps to the foreland and localises beyond the distal extensional basin, as a mechanism to aid the wedge taper angle to a critical value.

480

#### [Figure 11]

A similar process is observed in the central basin of EXP3B. The forward verging thrust formed early along the proximal extensional basin is active at the moment of stress build up and strain localisation in the central basin (Fig. 7; 74 mm displacement). Translation of the thrust sheet on top of the partially inverted central basin creates the same hindering effect as in EXP2B and the back-thrust becomes inactive. Instead of transferring all the stress to the new orogenic front, both forward thrusts are coevally active for ~20 minutes (2 cm of displacement), until the growth of the wedge is such that shortening is accommodated by a new frontal thrust along the distal extensional basin (Fig. 11b; 94 mm displacement). After this process, internal deformation of the wedge ceases and all shortening is accommodated by the new orogenic front. These two examples are indicative of how extensional basins in foreland fold-and-thrust belts are

490

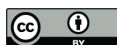

likely to localise the onset of thrusts, but their effectivity, duration and chronological order will depend on their initial position, distance between basins and relative distance to the indenter.

#### 5.4 Comparison with previous case studies

Our modelling results can be compared to case studies of fold-and-thrust belts forming over previously extended crust.

495 While aspects such as crustal composition, type of syn-rift infill, shortening direction and its variation over time, and distances or thicknesses may differ, we argue that our findings can be extrapolated from modelling to nature in order to provide first-order insights on the evolution of deformation and basin inversion in fold-and-thrust belts. Here we compare the most relevant aspects of our models with natural examples across multiple length scales.

##### 5.4.1 Carpathians

500 The Carpathian Mountains in Central-Eastern Europe formed as a result of the subduction of the European plate below the Adriatic plate and the associated closure of two extensional basins located behind an extended margin (Picha et al., 2006; Schmid et al., 2008) (Fig. 12a; left panel). These conditions resemble those for EXP3B, where three sections of previously extended crust are subjected to shortening mainly from one direction (i.e. moving wall). Convergence and early stages of collision, lasting from Late Cretaceous to Paleocene, initially manifested as a series of frontal thrusts that

505 localised along the pre-orogenic extensional basin closest to the orogenic front (Beidinger & Decker, 2016, Fig. 12a; left panel). As interpreted for EXP3B, there is also evidence of contraction and partial inversion of the extensional basins at these early stages in Carpathians, without manifestation of crustal rupture at surface. While estimating the amount of shortening having occurred in the extensional basins in such natural scenarios can be difficult, from our models we can quantify up to 19% and 27% of cumulative strain in the central and distal basins respectively, before new contractional

510 faults form in their surroundings. Ongoing deformation in the Late Oligocene was characterised by the formation of in-sequence thrust sheets along the central basin (Magura Flysch, Fig. 12a; left panel), forming the Inner Carpathians. This stage culminated in the cross-cutting of the central basin as the indenter formed by the Adriatic plate continued its progression towards the European Plate. At later stages, strain localisation was transferred to the most distal extensional basin (Silesian unit, Fig. 12a; left panel), giving rise to the Outer Carpathians. A very similar behaviour was observed in

515 EXP3B, where the central basin showed evidence of mild basin inversion until it was cross-cut by the thrust sheet incoming from the accretionary front (Fig. 12a; right panel). Final stages in EXP3B were characterised by the formation of a wedge with a frontal thrust that originated along the most distal extensional basin, which uplifted and folded the syn-extensional strata (Fig. 12a; right panel). Similarly, the Late Miocene in the Carpathians is distinguished by the progression of the fold-and-thrust belt, which completely uplifted the distant extensional Silesian units (Fig. 12a; left

520 panel), which is the only syn-extensional unit widely exposed in the surface of the Western Outer Carpathians (Picha et al., 2006). From this comparison we can better understand how stresses are transferred across a heterogeneous crust. Both the natural prototype and the experimental results indicate that, when multiple extensional basins are present, the most proximal one will absorb the majority of the stress at initial stages and will then continue its deformation, in-sequence, from the deformation front towards the foreland.

525

[Figure 12]

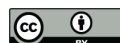

#### 5.4.2 Atlas

The Atlas Mountains in Northwest Africa formed as a result of multiple episodes of extension and compression, governed by major changes in global plate kinematics. Two main stages of deformation can be discerned for them; first an extensional phase, linked to the opening of the Tethys and North Atlantic oceans, and the posterior compression and inversion, associated with the convergence and collision of the African and European plates (Mattauer et al., 1977; Roca et al., 2004; Teixell et al., 2003). Although there is general agreement on this first-order multistage tectonic history, understanding the temporal relationships of structural features observed in the geological record remains a challenge. Comparison with EXP2B may shed light on how a fold-and-thrust belt evolves when multiple extended regions of crust are present in the foreland. Prior to convergence, the geological setting in the Atlas region consisted of the Tell passive margin in the northwest, inherited from the Tethys ocean opening and characterised by mostly NW dipping normal faults, and the Atlas trough to the SE, oriented parallel to the extension of the passive margin (Bracene & de Lamotte, 2002, Fig. 12b; left panel). Early stages of compression in the Late Lutetian resulted in a mild basin inversion in the Atlas trough. Despite the presence of inherited rifting structures in the margin, it has been suggested that the Tell passive margin behaved as a rigid body and far-field compressional stresses were transmitted along a deep detachment trough the crust (Bracene & de Lamotte, 2002). Strain subsequently localised within the limits of the Atlas trough (Fig. 12b; left panel), which is analogous to observations in EXP2B. In this experiment, initial stages of deformation showed a partial inversion and localisation of forward and back thrusts along the central extensional basin (Fig. 12b; right panel), keeping the proximal crustal section undeformed. At later stages, a new out-of-sequence thrust formed, and a pop-up structure developed in the proximity of the moving wall. In the natural example, deformation during the Miocene consisted in the accommodation of shortening with frontal thrusts in the proximal area (Tell margin), and the creation of a typical accretionary wedge, growing from the NW towards the SE (Fig. 12b; left panel). Ongoing deformation in the Pleistocene triggered the reactivation of the partially inverted structures that formed during the Late Lutetian in the Atlas trough, and strain localisation was transferred again to these distal regions of the foreland, exactly as observed in EXP2B. The amount of shortening at this stage for the Atlas system is estimated to be between 15% and 25% (e.g. Teixell et al., 2003; Bracene & de Lamotte, 2002; Beauchamp et al., 1999). Similarly, PIV-derived calculations from our models indicate values of up to 26 % of cumulative strain prior to significant crustal rupture. Differences in the initial conditions prior to inversion can be pointed out between the Atlas system and EXP2B. However, the complex first-order evolution, with special emphasis on the intermediate stage where compressional stresses are transferred along the rigid crust and on to a basin located further in the foreland of the accretionary wedge, remains very similar between nature and our selected model. Comparison with other models from this series also suggest there might be a threshold distance between the indenter or orogenic front and the first extensional basin in order to observe intense reactivation or not. In EXP1B, where a distal basin was located away from the moving wall, first a series of contractional faults developed in the proximity of the moving wall and subsequently deformation was also transferred towards the foreland. In contrast, when an extensional basin was incorporated in the crust at a closer distance to the moving wall (EXP2B), strain was first accommodated by basin contraction and uplift and then jumped back to the proximity of the indenter.

#### 5.4.3 Basin uplift

Several components of basin inversion at a more local scale, identified in the experiments during the stress build-up phase, can be directly compared to previous observations of basin uplift from the geological record. The Winterton High (Southern North Sea) is a widely studied classic symmetric inverted graben (e.g. Badley et al., 1989; Panien et al., 2005; Zwaan et al., 2022). Analysis from seismic data has revealed that the basin infill was compacted and vertically expelled





from the original basin (Badley et al., 1989), as observed in the distal basin of EXP1B (Fig. 13a). Due to the experimental setup in our models, compressional forces are only inbound from one side of the basins, reason that explains the asymmetry in the basin uplift and vertical upwarping, as opposed to the symmetry observed in this natural scenario. Reverse reactivation of the rift boundary faults has been proposed for the Winterton High. We do not observe strong localisation along the former normal faults in the models, but the limits of the area being vertically uplifted are strongly determined by the location of the extensional basin (Figs. 10 and 13a). It is also important to point out that this graben has suffered contraction and uplift during stages of Cenozoic compression that affected northwestern Europe; despite not being present in the immediate proximity of a fold-and-thrust belt, its reactivation demonstrates that basin inversion can be associated to compressional forces originating several hundreds of kilometers away from affected area.

In natural scenarios, partially inverted grabens may also show strong asymmetry when they are closer to the emplacement of the fold-and-thrust belt, as interpreted for the East Java Sea Basin, Southeast Asia. In this natural example, compressional forces proceeding from the North invert wedge-shaped syn-extensional strata, resulting in harpoon or arrowhead geometries (Goudswaard & Jenyon 1988, McClay 1995). Similar structures have been identified in our models, such as in the distal basin of EXP3B, where contractional faulting localised along the weaker microbeds resulted in an asymmetric harpoon geometry (Fig. 13b). Certain areas of the East Java Sea Basin show basin inversion due to reverse motion along the extensional listric fault (Zwaan et al., 2022). However, analysis from seismic data indicates that other inverted regions in the same basin localise compressional deformation partially via normal fault reactivation, and partially via new frontal thrusts that originate in the proximity of the normal faults (McClay, 1995) (Fig. 13b). This pattern is also observed in our experiments; the unfavorable orientation of steep normal faults prevents their contractional reactivation, but new thrusts always form in the proximity of pre-existing extensional faults.

### [Figure 13]

Another expression of an inverted graben has been identified in the Denison Trough, Eastern Australia (Korsch et al., 2009, Buiter et al., 2009). Previous studies have estimated an uplift along the synrift strata (~400 m) that doubles that observed for the surrounding basement rocks (~200 m) (Buiter et al., 2009), as recognised in several of the partially inverted basins in all our models (Fig. 9). In the example of the Denison Trough, the fact that not only synrift strata was uplifted, but also a section of the crystalline basement surrounding the basin was, is comparable to observations from the distal basin of EXP2B. In this model, a backthrust formed in line with the rift boundary faults while a new frontal thrust originated at the same location from the detachment layer, but propagated towards the surface along the quartz sand layer (i.e. proxy for crystalline basement) instead (Fig. 13b). Whether it is the forward or backward thrust that reactivates border normal faults remains difficult to predict. Still, from our models we can suggest the following boundary conditions that may lean towards one or the other: (a) occurrence of a single extensional basin tends to always localise the frontal thrust along the foreland-most border normal fault, (b) when multiple extensional basins are present in the foreland, then the distance between them will be the factor controlling how each basin will be inverted. The longer the distance between the basins, the higher the expectations will be that the frontal thrust is also formed along the foreland-most basin bounding normal faults.

## 7. Conclusions

We draw the following conclusions from our series of analogue experiments investigating the inversion of multiple basins in foreland fold-and-thrust belts:





- Extensional basins proximal to the orogenic front tend to strongly localise shortening, with frontal thrusts developing along weak basin, and provoking its contraction and uplift very early in the shortening cycle.
- Extensional basins will act as efficient stress localisers and will prevent stress transfer beyond their location; no thrusts form beyond their position until very advanced stages of deformation, in which the wedge taper angle gets too high, and the system counteracts such instability by forming a new frontal thrust beyond the extensional basin.
- The presence of extensional basins seems to slightly increase the value of the critical wedge taper angle, possibly associated to longer periods of thrust localism along the weak basins. Heterogeneities in terms of physical properties in the interior of the wedge do not seem to substantially affect the overall evolution of deformation.
- Inversion of basins located between other two basins tend to be short lived, as its brittle strength is strongly dependent on the amount of overburden and/or prograding thrust sheets, which hinder the inversion of extensional structures by increasing the vertical principal stress ( $\sigma_3$ )
- Degree and type of inversion of extensional basins depends on both the relative location and distance to the orogenic front, and the presence of another extensional basins between a given basin and the orogenic front.
- Extensional basins located at large distances from the indenter show early evidence of inversion, as interpreted in nature. While EXP1B showed the maximum values of average cumulative strain within the basin prior to its failure by shortening, we cannot extrapolate our observations to nature because the amount of inversion will also depend on factors such as the degree of interplate coupling and on the structural, thermal and/or compositional conditions of the lithosphere, variables that are not being modelled here. Although we cannot define a threshold distance or define the nature of the basin inversion for distal extensional basins in the foreland of fold-and-thrust belts, our analogue models provide conceptual models for comparison with natural examples.



## Acknowledgements

We would like to thank W. Kraus for his endless support in the laboratory and to L. Gotzen and J. Wagner for their invaluable assistance during laboratory experiments and for the fruitful discussions when analysing the results.

## Data availability statement

635 Images, videos and selected raw PIV files will be made freely available as a data publication deposited in the GFZ Data Services database.

## References

- Angrand, P., Ford, M., Ducoux, M., and De Saint Blanquat, M.: Extension and early orogenic inversion along the basal detachment of a hyper-extended rifted margin: an example from the Central Pyrenees (France), *J. Geol. Soc. London*, jgs2020-003, <https://doi.org/10.1144/jgs2020-003>, 2021.
- 640 Badley, M.E., Price, J.D., and Backshall, L.C.: Inversion, reactivated faults and related structures: seismic examples from the southern North Sea, *Geol. Soc. Spec. Publ.*, 44, 201-219, <https://doi.org/10.1144/GSL.SP.1989.044.01.12>, 1989
- Beauchamp, W., Allmendinger, R.W., Barazangi, M., Demnatie, A., El Alji, M., Dahmani, M.: Inversion tectonics and the evolution of the High Atlas Mountains, Morocco, based on a geological–geophysical transect, *Tectonics*, 19, 163–184, 1999.
- 645 Beidinger, A., and Decker, K.: Paleogene and Neogene kinematics of the Alpine-Carpathian fold-thrust belt at the Alpine-Carpathian transition. *Tectonophysics*, 690, 263–287. doi:10.1016/j.tecto.2016.09.002, 2016.
- Bonini, M., Sani, F., and Antonielli, B.: Basin inversion and contractional reactivation of inherited normal faults: A review based on previous and new experimental models, *Tectonophysics*, 522–523, 55–88, <https://doi.org/10.1016/j.tecto.2011.11.014>, 2012.
- 650 Bosworth, W. and Tari, G.: Hydrocarbon accumulation in basins with multiple phases of extension and inversion - W Desert (Egypt) and W Black Sea, *Solid Earth*, 12, 59–77, <https://doi.org/10.5194/se-12-59-2021>, 2021
- Bracène R., de Lamotte D. F.: The origin of intraplate deformation in the Atlas system of western and central Algeria: from Jurassic rifting to Cenozoic–Quaternary inversion, *Tectonophysics*, 357, 1–4, 207-226, [https://doi.org/10.1016/S0040-1951\(02\)00369-4](https://doi.org/10.1016/S0040-1951(02)00369-4), 2002.
- 655 Brewer, J.A. and Turcotte, D.L.: On the stress system that formed the Laramide Wind River Mountains, Wyoming, *Geophys. Res. Lett.*, 7, 449-452, <https://doi.org/10.1029/GL007i006p00449>, 1980.
- Brun, J. P.: Narrow rifts versus wide rifts: inferences for the mechanics of rifting from laboratory experiments, *Phil. Trans. R. Soc. Lond.*, 357, 695–712, 1999.
- 660 Brun, J. P. and Nalpas, T.: Graben inversion in nature and experiments, *Tectonics*, 15, 677–687, <https://doi.org/10.3969/j.issn.1008-0589.2016.04.07>, 1996.
- Buchanan, P.G., and McClay, K.R.: Sandbox experiments of inverted listric and planar fault systems. In: Cobbold, P.R. (Ed.), *Experimental and Numerical Modelling of Continental Deformation*. *Tectonophysics*, 188, 97-115, 1991.
- 665 Buck, W. R.: Modes of continental lithospheric extension, *J. Geophys. Res.*, 96, 20161, <https://doi.org/10.1029/91JB01485>, 1991.



- Buiter, S. J. H., Pfiffner, O. A., and Beaumont, C.: Inversion of extensional sedimentary basins: A numerical evaluation of the localisation of shortening, *Earth Planet. Sci. Lett.*, 288, 492–504, <https://doi.org/10.1016/j.epsl.2009.10.011>, 2009.
- 670 Butler, R. and Bond, C.: Thrust systems and contractional tectonics (Chapter 9). (Eds): Nicola Scarselli, Jürgen Adam, Domenico Chiarella, David G. Roberts, Albert W. Bally, *Regional Geology and Tectonics* (Second Edition), Elsevier, 149–167, <https://doi.org/10.1016/B978-0-444-64134-2.00008-0>, 2020.
- Chadwick, R. A.: Aspects of basin inversion in southern Britain, *J. - Geol. Soc.*, 150, 311–322, <https://doi.org/10.1144/gsjgs.150.2.0311>, 1993.
- 675 Cooper, M. and Warren, M. J.: Inverted fault systems and inversion tectonic settings, *BV*, 169–204 pp., <https://doi.org/10.1016/b978-0-444-64134-2.00009-2>, 2020.
- Cooper, M. A. and Williams, G. D. (Eds.): *Inversion tectonics*, *Geol. Soc. Spec. Publ.* 44, Geological Society, London, UK, 1485 375 pp., <https://doi.org/10.1144/GSL.SP.1989.044.01.25>, 1989.
- Coulomb, C.A.: Sur l'application des règles de maximis et minimis à quelques problèmes de statique, relatifs à l'architecture. *Acad. R. Sci. Paris Mem. Math. Phys.* 7, 343–382, 1773.
- 680 Coward, M.P.: Inversion tectonics. In: Hancock, P.L. (Ed.), *Continental Deformation*. Pergamon Press, Oxford, pp. 289–304, 1994.
- Cubas, N., Barnes C., and Maillot B.: Inverse method applied to a sand wedge: Estimation of friction parameters and uncertainty analysis, *J. Struct. Geol.*, 55, 101–113, doi:10.1016/j.jsg.2013.07.003, 2013.
- 685 Dahlen, F. A.: Noncohesive Critical Coulomb Wedges: an Exact Solution., *J. Geophys. Res.*, 89, 10125–10133, <https://doi.org/10.1029/JB089iB12p10125>, 1984.
- Dahlen, F. A.: Critical taper model of fold-and-thrust belts and accretionary wedges, *Annu. Rev. Earth Planet. Sci.*, 18, 55–99, doi:10.1146/annurev.earth.18.1.55, 1990.
- Del Ventisette, C., Montanari, D., Sani, F., and Bonini, M.: Basin inversion and fault reactivation in laboratory experiments, *J. Struct. Geol.*, 28, 2067–2083, <https://doi.org/10.1016/j.jsg.2006.07.012>, 2006.
- 690 Delvaux, D.: Tectonic and palaeostress evolution of the Tanganyika-Rukwa-Malawi rift segment, East African Rift System, *Peri-Tethys Mem. 6 Peri-Tethyan Rift. Basins Passiv. Margins*, 545–567, 2001.
- Di Domenica, A., Bonini, L., Calamita, F., Toscani, G., Galuppo, C., and Seno, S.: Analogue modeling of positive inversion tectonics along differently oriented pre-thrusting normal faults: An application to the Central-Northern Apennines of Italy, *Bull. Geol. Soc. Am.*, 126, 943–955, <https://doi.org/10.1130/B31001.1>, 2014.
- 695 England, P.: Constraints on extension of continental lithosphere, *J. Geophys. Res.*, 88, 1145, <https://doi.org/10.1029/JB088iB02p01145>, 1983.
- Gottron, D.: The influence of basement structure on the geometry of fold-thrust-belts – an analog modelling study, MSc Thesis, RWTH Aachen University, Aachen, Germany, 2018.
- 700 Goudswaard, W. and Jenyon, M. K. (eds): *Seismic atlas of structural and stratigraphic features*. European Association of Exploration Geophysicists, 1988.
- Granado, P., Ferrer, O., Muñoz, J. A., Thöny, W., and Strauss, P.: Basin inversion in tectonic wedges: Insights from analogue modelling and the Alpine-Carpathian fold-and-thrust belt, *Tectonophysics*, 703–704, 50–68, <https://doi.org/10.1016/j.tecto.2017.02.022>, 2017.



- 705 Granado, P. and Ruh, J. B.: Numerical modelling of inversion tectonics in fold-and-thrust belts, *Tectonophysics*, 763, 14–29, <https://doi.org/10.1016/j.tecto.2019.04.033>, 2019.
- Guiraud, R. and Bosworth, W.: Senonian basin inversion and rejuvenation of rifting in Africa and Arabia: synthesis and implications to plate-scale tectonics, *Tectonophysics*, 282, 39–82, [https://doi.org/10.1016/S0040-1951\(97\)00212-6](https://doi.org/10.1016/S0040-1951(97)00212-6), 1997.
- 710 Guiraud, R. and Maurin, J. C.: Early Cretaceous rifts of Western and Central Africa: an overview, *Tectonophysics*, 213, 153–168, [https://doi.org/10.1016/0040-1951\(92\)90256-6](https://doi.org/10.1016/0040-1951(92)90256-6), 1992.
- Handin, J.: On the Coulomb-Mohr failure criterion, *J. Geo- phys. Res.*, 74, 5343, <https://doi.org/10.1029/JB074i022p05343>, 1969.
- Hansen, T. H., Clausen, O. R., and Andresen, K. J.: Thick- and thin-skinned basin inversion in the Danish Central Graben, North Sea – the role of deep evaporites and basement kinematics, *Solid Earth*, 12, 1719–1747, <https://doi.org/10.5194/se-12-1719-2021>, 2021.
- 715 Hubbert, M. K.: Theory of scale models as applied to the study of geologic structures, *Geol. Soc. Am. Bull.*, 48, 1459–1520, <https://doi.org/10.1130/GSAB-48-1459>, 1937.
- Jaeger, J.C., Cook, N.G.W.: *Fundamentals of Rock Mechanics*. Chapman & Hall, Wiley, New York, 585 pp, 1976.
- 720 Jagger, L. J. and McClay, K. R.: Analogue modelling of inverted domino-style basement fault systems, *Basin Res.*, 30, 363–381, <https://doi.org/10.1111/bre.12224>, 2018.
- Jara, P., Likerman, J., Charrier, R., Herrera, S., Pinto, L., Villarroel, M., and Winocur, D.: Closure type effects on the structural pattern of an inverted extensional basin of variable width: Results from analogue models, *J. South Am. Earth Sci.*, 87, 157–173, <https://doi.org/10.1016/j.jsames.2017.10.018>, 2018.
- 725 Kley, J.: Timing and spatial patterns of Cretaceous and Cenozoic inversion in the Southern Permian Basin, *Geol. Soc. Spec. Publ.*, 469, 19–31, <https://doi.org/10.1144/SP469.12>, 2018.
- Klinkmüller, M., Rosenau, M., and Kemnitz, H.: Properties of granular analogue model materials : A community wide survey, *Tectonophysics*, <https://doi.org/10.1016/j.tecto.2016.01.017>, 2016.
- Korsch, R.J., Totterdell, J.M., Cathro, D.L., and Nicoll, M.G.: Early Permian East Australian Rift System. *Aust. J. Earth Sci.* 56 (3), 381–400, 2009.
- 730 Koyi, H.: Analogue modelling: From a qualitative to a quantitative technique - A historical outline. *J. Pet. Geol.* 20 (2), 223–238, 1997.
- Krzywiec, P., Kufrasa, M., Poprawa, P., Mazur, S., Koperska, M., and Ślęmp, P.: Together but separate: decoupled Variscan (late Carboniferous) and Alpine (Late Cretaceous–Paleogene) inversion tectonics in NW Poland, *Solid Earth*, 13, 639–658, <https://doi.org/10.5194/se-13-639-2022>, 2022
- 735 Lacombe O. and Bellahsen N.: Thick-skinned tectonics and basement-involved fold-thrust belts. Insights from selected Cenozoic orogens. *Geological Magazine*, 153, 5–6, 763–810, 2016.
- Likerman, J., Burlando, J.F., Cristallini, E.O. and Ghiglione, M.C.: Along-strike structural variations in the Southern Patagonian Andes: Insights from physical modelling, *Tectonophysics*, 590, 106–120, doi: 10.1016/j.tecto.2013.01.018, 2013.
- 740 Maillot, B.: A sedimentation device to produce uniform sand packs. *Tectonophysics*, 593, 85–94. <http://dx.doi.org/10.1016/j.tecto.2013.02.028>, 2013.



- Mattauer, M., Tapponnier, P., and Proust, F.: Sur les mécanismes de formation des chaînes intracontinentales : l'exemple des chaînes atlasiques du Maroc, *Bull. Soc. géol. France*, 521–526, 1977.
- 745 McClay, K. R.: The geometries and kinematics of inverted fault systems: A review of analogue model studies, *Geol. Soc. Spec. Publ.*, 88, 97–118, <https://doi.org/10.1144/GSL.SP.1995.088.01.07>, 1995.
- McClay, K. R.: Recent advances in analogue modelling: Uses in section interpretation and validation, *Geol. Soc. Spec. Publ.*, 99, 201–225, <https://doi.org/10.1144/GSL.SP.1996.099.01.16>, 1996.
- Nalpas, T., Le Douaran, S., Brun, J. P., Unternehr, P., and Richert, J. P.: Inversion of the Broad Fourteens Basin (offshore Netherlands), a small-scale model investigation, *Sediment. Geol.*, 95, 237–250, [https://doi.org/10.1016/0037-0738\(94\)00113-9](https://doi.org/10.1016/0037-0738(94)00113-9), 1995.
- 750 Panien, M., Schreurs, G., and Pfiffner, A.: Sandbox experiments on basin inversion: Testing the influence of basin orientation and basin fill, *J. Struct. Geol.*, 27, 433–445, <https://doi.org/10.1016/j.jsg.2004.11.001>, 2005.
- Panien, M., Buitter, S. J. H., Schreurs, G., and Pfiffner, O. A.: Inversion of a symmetric basin: Insights from a comparison between analogue and numerical experiments, *Geol. Soc. Spec. Publ.*, 253, 253–270, <https://doi.org/10.1144/GSL.SP.2006.253.01.13>, 2006.
- Pfiffner, O.A.: *Geologie der Alpen*. Haupt Verlag/UTB, Bern-Stuttgart-Wien. 360 pp, 2009.
- Phillips, T. B., Jackson, C. A.-L., Bell, R. E., and Duffy, O. B.: Oblique reactivation of lithosphere-scale lineaments controls rift physiography – the upper-crustal expression of the Sorgenfrei–Tornquist Zone, offshore southern Norway, *Solid Earth*, 9, 403–429, <https://doi.org/10.5194/se-9-403-2018>, 2018.
- 760 Picha, F. J., Stráňík, Z., and Krejčí, O.: Geology and Hydrocarbon Resources of the Outer Western Carpathians and Their Foreland, Czech Republic, *Carpathians Their Foreland* <subtitle> *Geology Hydrocarb. Resour.*, <https://doi.org/10.1306/985607m843067>, 2006.
- Ramberg, H.: *Gravity, Deformation and the Earth's Crust*. Academic Press, London, 452 pp, 1981.
- 765 Ritter, M. C., Leever, K., Rosenau, M., and Oncken, O.: Scaling the sandbox—Mechanical (dis) similarities of granular materials and brittle rock, *J. Geophys. Res. Solid Earth*, 121, 6863–6879, <https://doi.org/10.1002/2016JB012915>, 2016.
- Roca, E., Frizon de Lamotte, D., Mauffret A., Bracène, R., Vergés, J., Benaouali, N., Fernandez, M., Munoz, J.A., Zeyen, H., in: Cavazza, W., Roure, F.M., Spakman W., Stampfli, G.M., Ziegler, P.A. (Eds.), *The Transmed Atlas – The Mediterranean Region from Crust to Mantle*, Springer, Berlin, Heidelberg, 2004
- 770 Sassi, W., Colletta, B., Balé, P., and Paquereau, T.: Modelling of structural complexity in sedimentary basins: The role of pre-existing faults in thrust tectonics, *Tectonophysics*, 226, 97–112, [https://doi.org/10.1016/0040-1951\(93\)90113-X](https://doi.org/10.1016/0040-1951(93)90113-X), 1993.
- Schmid, S.M., Bernoulli, D., Fügenschuh, B., Matenco, L., Schefer, S., Schuster, R., Tischler, M., and Uztaszewski, K.: The Alpine-Carpathian-Dinaridic orogenic system: correlation and evolution of tectonic units. *Swiss Journal of Geoscience* 101, 139–183, doi:10.1007/s00015-008-1247-3, 2008.
- 775 Scisciani, V.: Styles of positive inversion tectonics in the Central Apennines and in the Adriatic foreland: Implications for the evolution of the Apennine chain (Italy), *J. Struct. Geol.*, 31, 1276–1294, <https://doi.org/10.1016/j.jsg.2009.02.004>, 2009.
- Scisciani, V., Patruno, S., Tavarnelli, E., Calamita, F., Pace, P., and Iacopini, D.: Multi-phase reactivations and inversions of paleozoic–mesozoic extensional basins during the Wilson cycle: Case studies from the north sea (UK) and the northern apennines (Italy), *Geol. Soc. Spec. Publ.*, 470, 205–243, <https://doi.org/10.1144/SP470-2017-232>, 2019.
- 780



- Souloumiac, P., Maillot, B., Leroy, Y.M.: Bias due to side wall friction in sand box experiments. *J. Struct. Geol.* 35, 90–101, 2012.
- Stockmal, G.S., Beaumont, C., Nguyen, M., Lee, B.: Mechanics of thin-skinned fold- and-thrust belts: insights from  
785 numerical models. In: Sears, J.W., Harms, T.A., Evenchick, C.A. (Eds.), *Whence the mountains? Inquiries into the evolution of orogenic systems*. Geological Society of America Special Paper 433, pp. 63–98, 2007.
- Teixell, A., M.-L. Arbolea, M. Julivert, and M. Charroud: Tectonic shortening and topography in the central High Atlas (Morocco), *Tectonics*, 22, 5, 1051, doi:10.1029/2002TC001460, 2003.
- Teixell, A., and Koyi, H. A.: Experimental and Field study of the effects of lithological contrasts on thrust related  
790 deformation, *Tectonics*, 22, 1054–1073, 2003.
- Twiss, R.J., Moores, E.M.: *Structural Geology*. W.H. Freeman and Company, New York, 532 pp, 1992.
- Vermeer, P.: Orientation of shear bands in biaxial tests, *Geotechnique*, 40(2), 223–236, 1990.
- Yagupsky, D.L., Cristallini, E.O., Fantin, J., Valcarce, G., Bottesi, G. and Varade, R.: Oblique half-graben inversion of the Mesozoic Neuquén Rift in the Malargüe fold and thrust belt, Mendoza, Argentina: new insights from analogue  
795 models. *Journal of Structural Geology*, 30, 839–853. <http://dx.doi.org/10.1016/j.jsg.2008.03.007>, 2008.
- Ziegler, P. A.: Geodynamic model for Alpine intra-plate compressional deformation in Western and Central Europe, *Geol. Soc. Spec. Publ.*, 44, 63–85, <https://doi.org/10.1144/GSL.SP.1989.044.01.05>, 1989.
- Ziegler, P.A.; Evolution of the Arctic–North Atlantic and the Western Tethys. *Mem.-Am. Assoc. Pet. Geol.* 43 (198 pp. and 30 plates), 1988.
- 800 Ziegler, P.A., Cloetingh, S., van Wees, J.-D.: Dynamics of intraplate compressional deformation: the Alpine foreland and other examples, *Tectonophysics* 252, 7–59, 1995.
- Ziegler, P.A., van Wees, J.-D., Cloetingh, S.: Mechanical controls on collision-related compressional intraplate deformation, *Tectonophysics*, 300, 103–129, 1998.
- Zwaan, F., Schreurs, G., Buiters, S. J. H., Ferrer, O., Reitano, R., and Willingshofer, E.: Analogue modelling of basin  
805 inversion: a review and future perspectives, 1–84, <https://doi.org/10.5194/se-2022-8>, 2022.

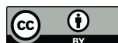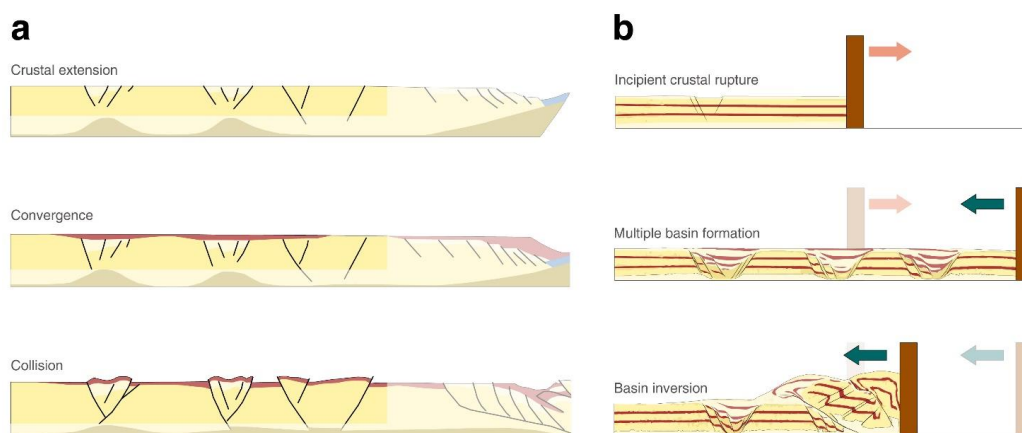

**Figure 1:** (a) Conceptual model of crustal extension and later foreland compressional deformation (redrawn from Ziegler 1989).  
 (b) Sketch representing the equivalent modelling stages presented in this study.

810

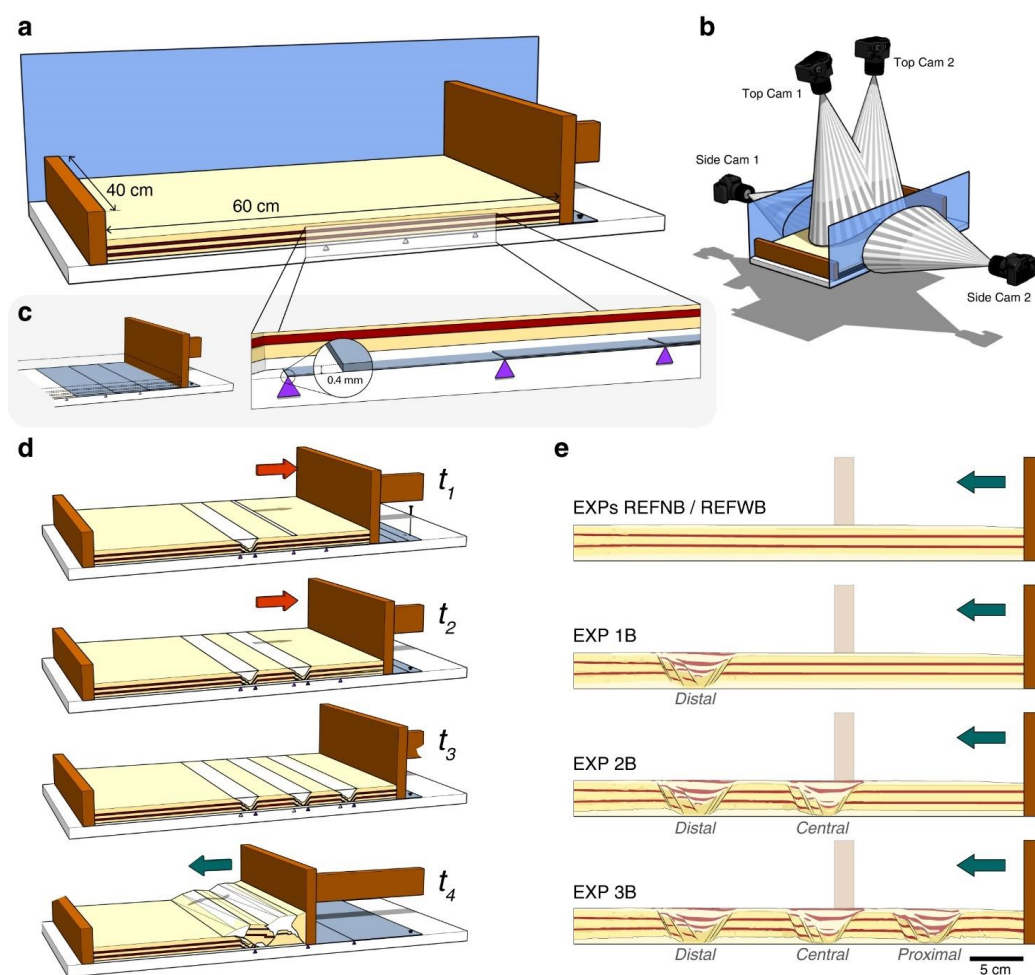

**Figure 2. Modelling set-up.** (a) Sketch of the employed apparatus, oblique view. (b) Sketch showing the overall camera setup for PIV processing. (c) Close up view of the basal sheets system. Triangles indicate the end of each sheet. (d) Illustrated example showing the steps involved in the basin formation -extension- and basin inversion -shortening- stages of the experiments. (e) Summary of initial conditions for the shortening experiments.

815



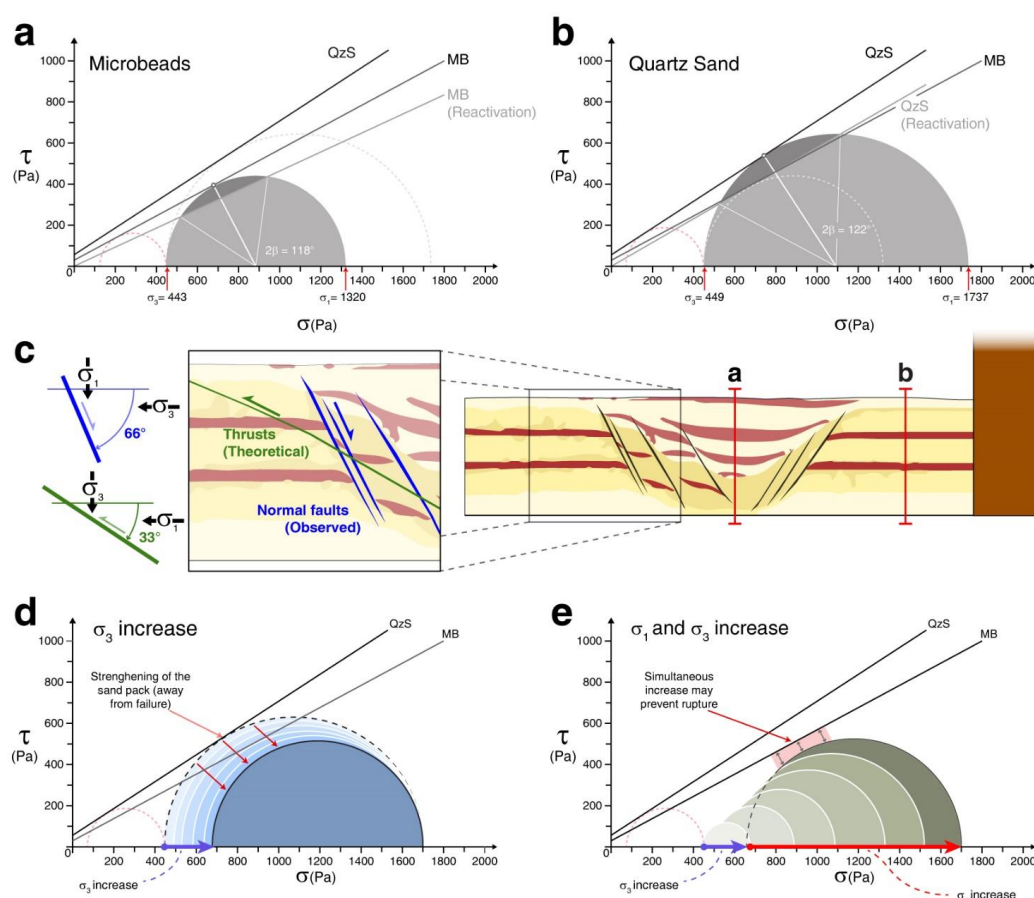

Figure 3. Mohr plots representing stress state at the base of a 3 cm thick layer of (a) microbeads and, (b) quartz sand, with their exemplary locations illustrated in red vertical lines in (c), red dotted lines indicate the stress state in the extensional phase,  $\beta$  = angle of the failure plane. (c) Inset showing the state of the crust after extension and before the onset of compression, including observed (blue, extensional faulting) and theoretical contractional (green) faulting and their spatial relationship with principal stresses  $\sigma_1$  and  $\sigma_3$  (d) Schematic representation of Mohr circle theoretical evolution with a  $\sigma_3$  increase. (e) Schematic representation of Mohr circle theoretical evolution with simultaneous  $\sigma_1$  and  $\sigma_3$  increase. MB= Microbeads, QzS= Quartz sand

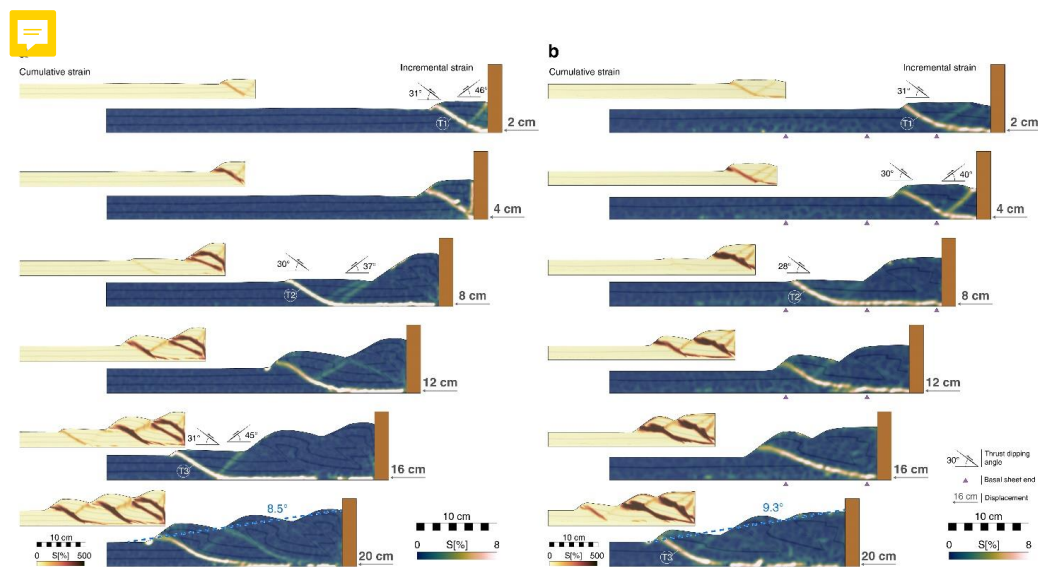

**Figure 4.** Comparison of side-view deformation evolution, differential and cumulative strain (a) Experiment REF-NB, reference experiment with no basal sheet. (b) Experiment REF-WB, reference experiment with basal sheets.

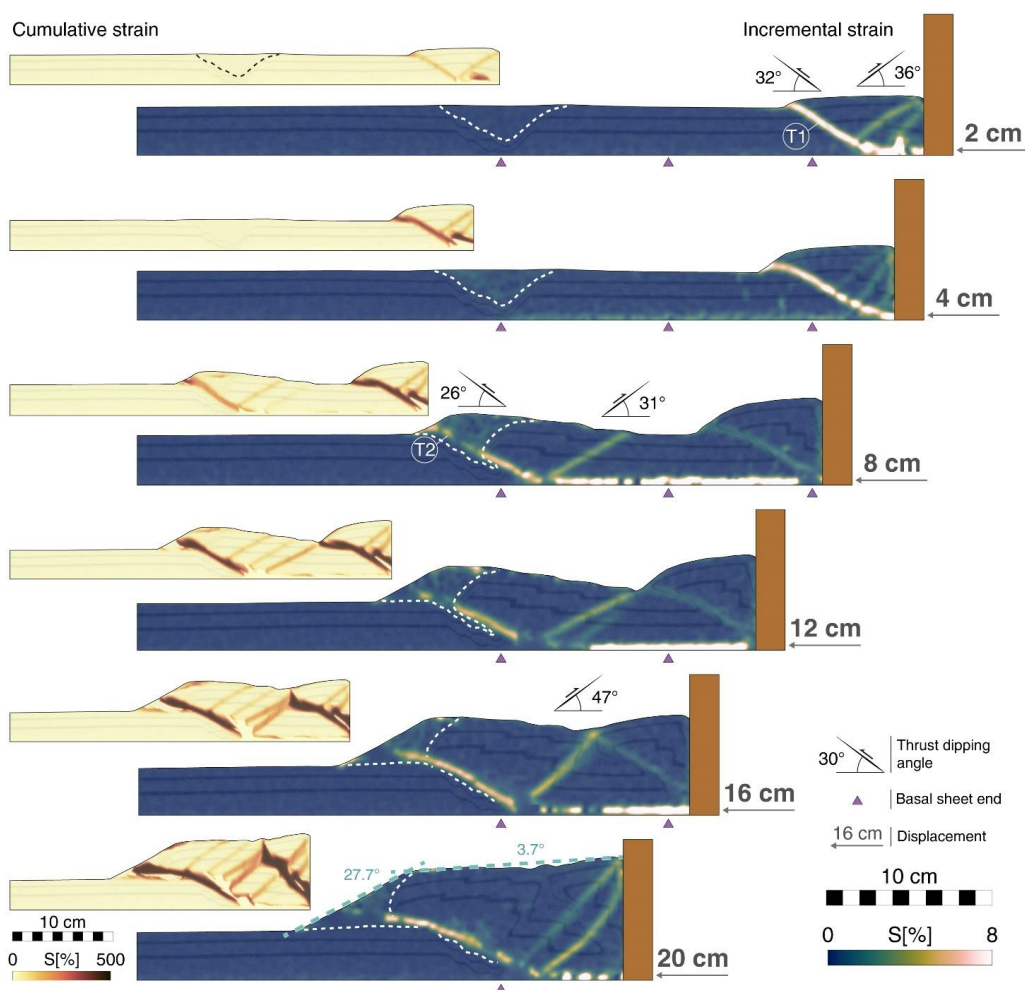

Figure 5. Experiment 1B evolution, differential and cumulative strain, side view. White dashed line marks the basin infill-crust interface.

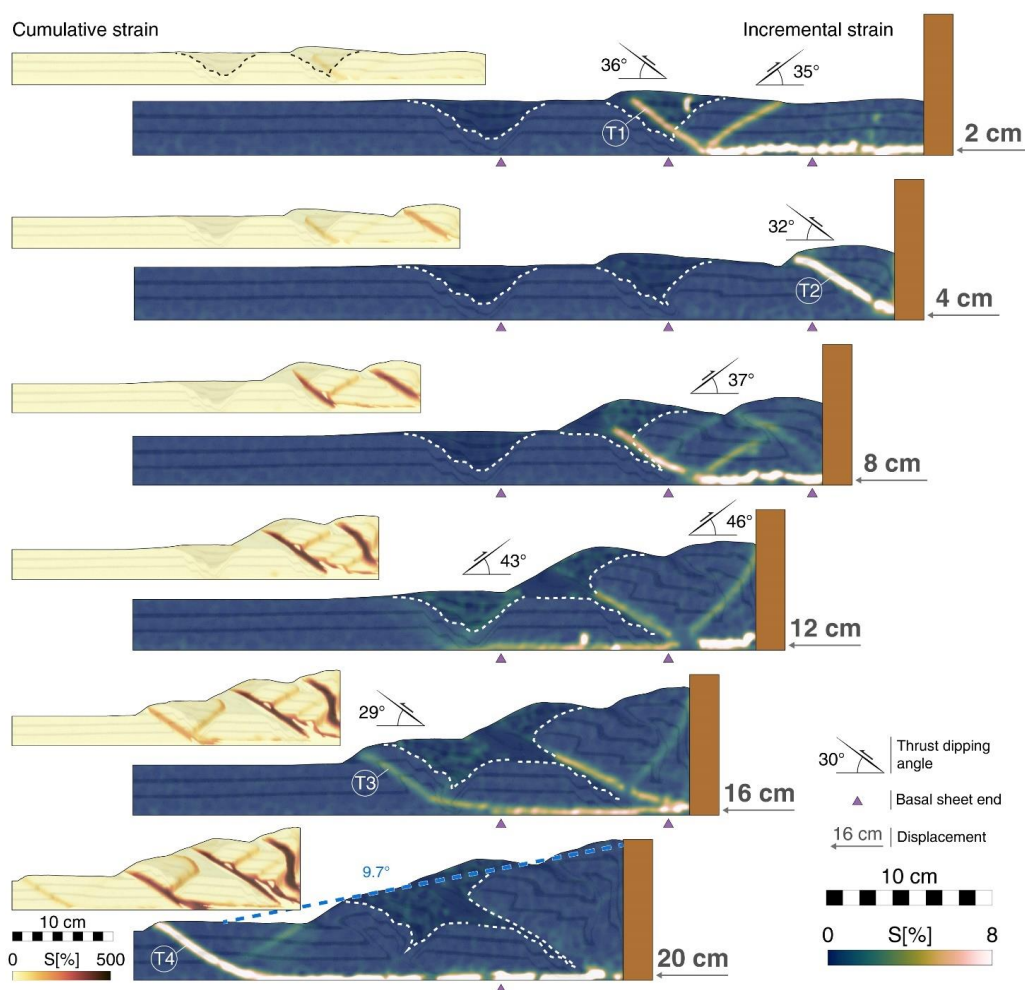

835 **Figure 6. Experiment 2B evolution, differential and cumulative strain, side view. White dashed line marks the basin infill-crust interface.**

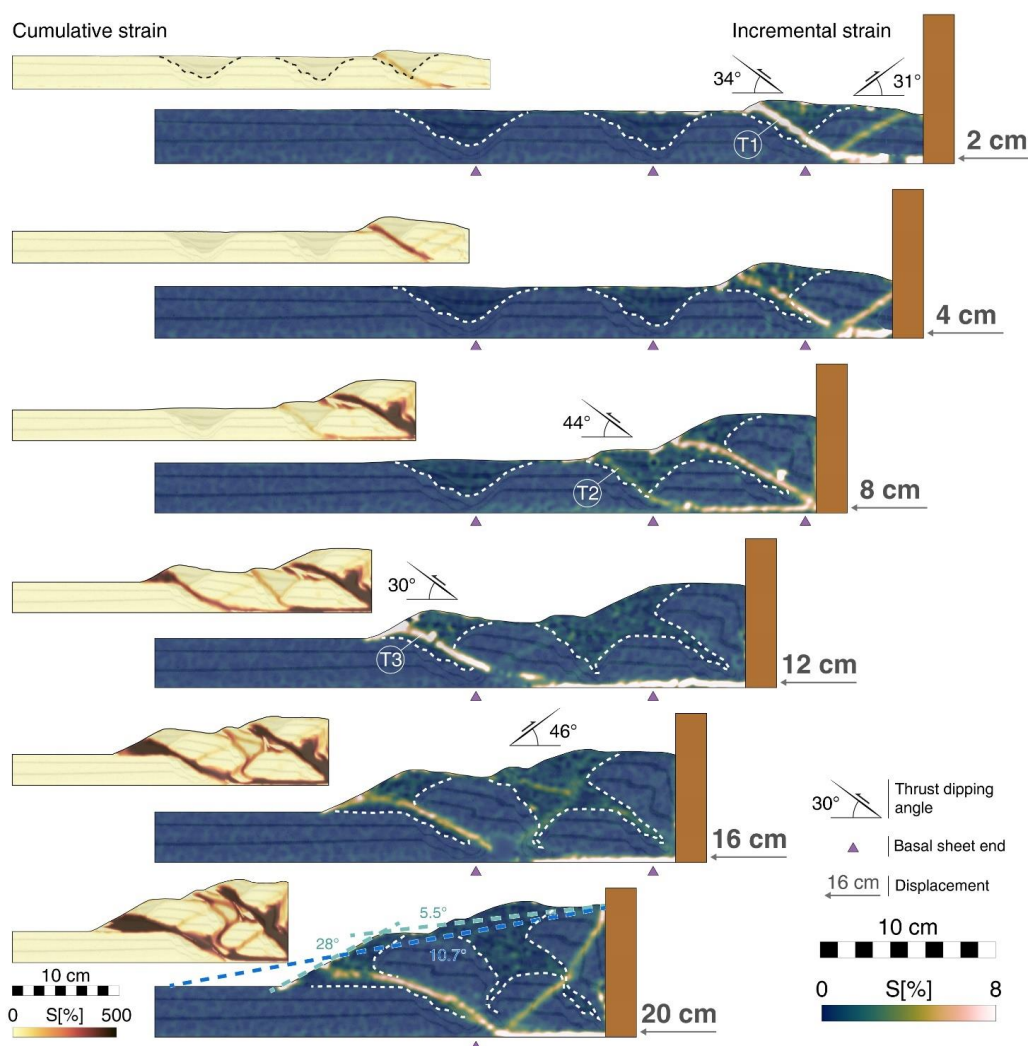

Figure 7. Experiment 3B evolution, differential and cumulative strain, side view. White dashed line marks the basin infill-crust interface.

840

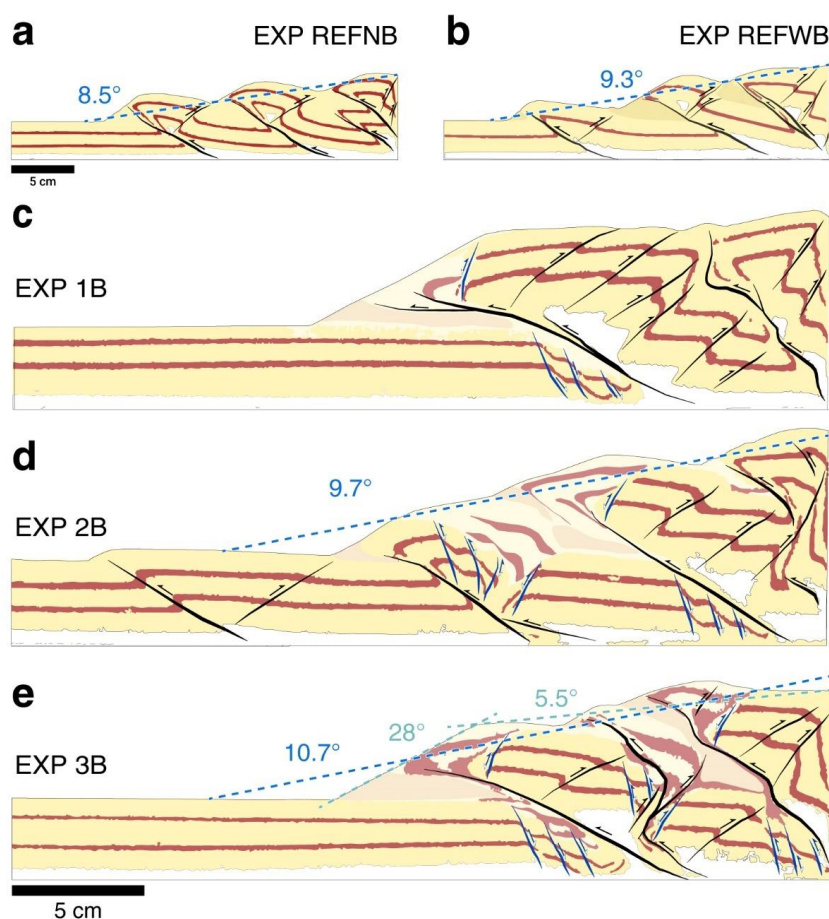

Figure 8. Interpretation sketches for all models after 20 cm of displacement, including visual guide for taper angle measurements. Values for EXP1B could not be determined as the taper is in transition into a critical taper, where no clear valleys or peaks are yet discernable in order to display a best fitting line (Stockmal et al., 2007)

845



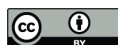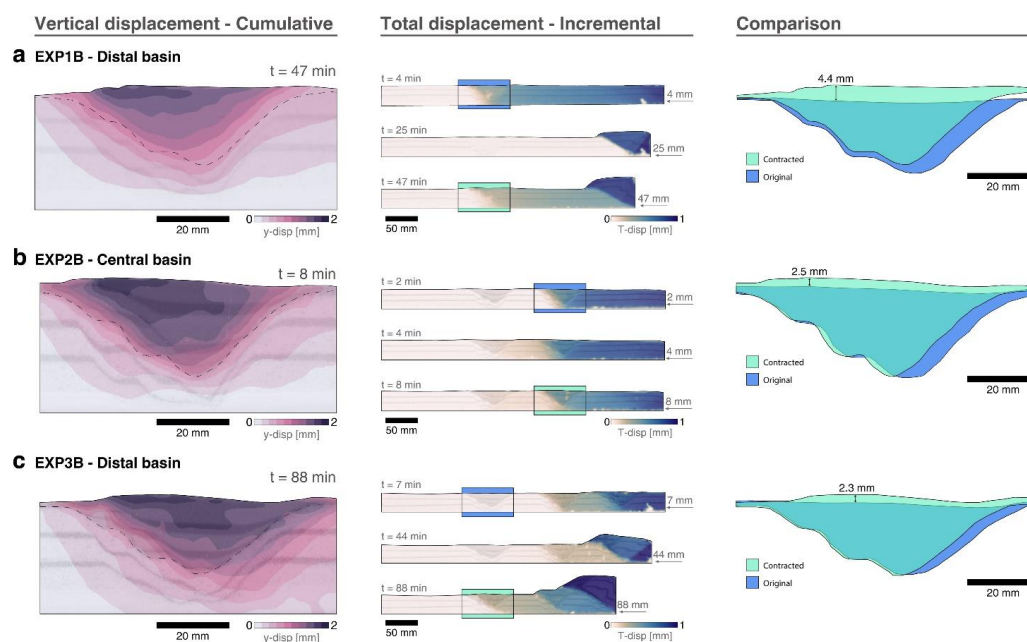

Figure 9. Close up view to selected basins. In EXP2B, despite having only 2 basins, the basin closest to the moving wall is referred to as “central” for ease of comparison between experiments. Left panel shows Y-displacement (vertical) before crustal failure, central panel shows total displacement at the indicated time intervals, and right panel is a drawn comparison between the original basin and its status before thrust development.

850

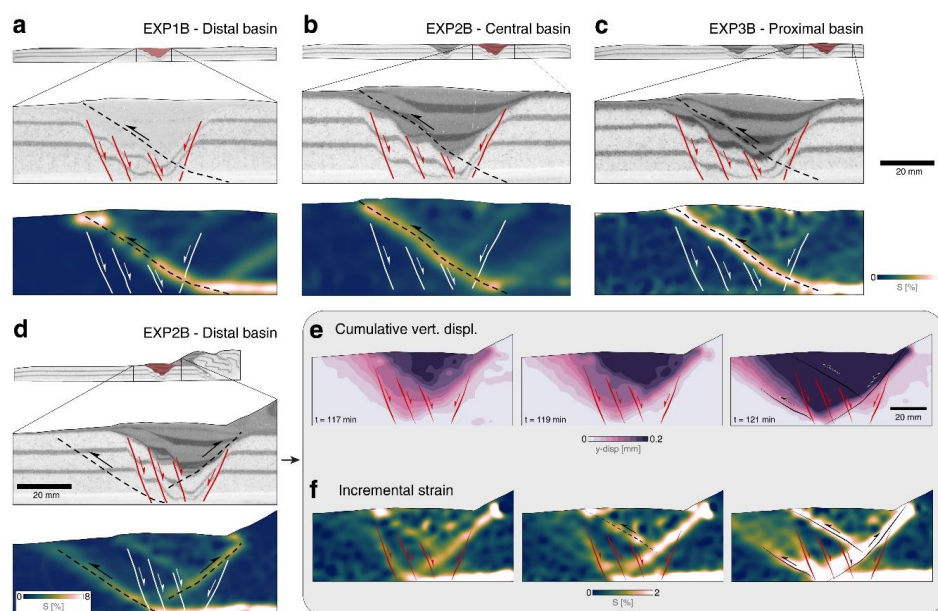

855 **Figure 10. Close up view to selected basins, highlighting thrust localisation. (a) Experiment 1B, distal basin. (b) Experiment 2B, central basin. (c) Experiment 3B, proximal basin. (d) Experiment 2B, distal basin. (e) Close-up view visualizing different time increments for cumulative vertical displacement and (f) incremental strain of the distal basin in EXP2B.**



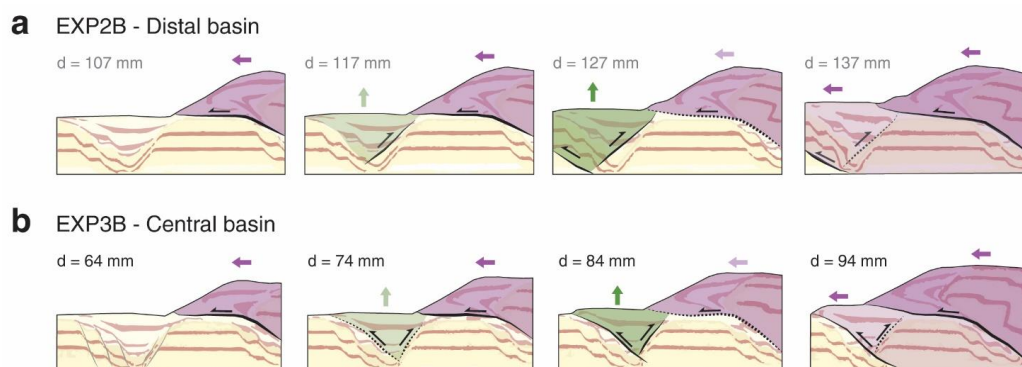

Figure 11. Interpreted sections of selected experiments showing thrust sheet progression and impact on basin inversion. (a) Experiment 2B, distal basin. (b) Experiment 3B, central basin.

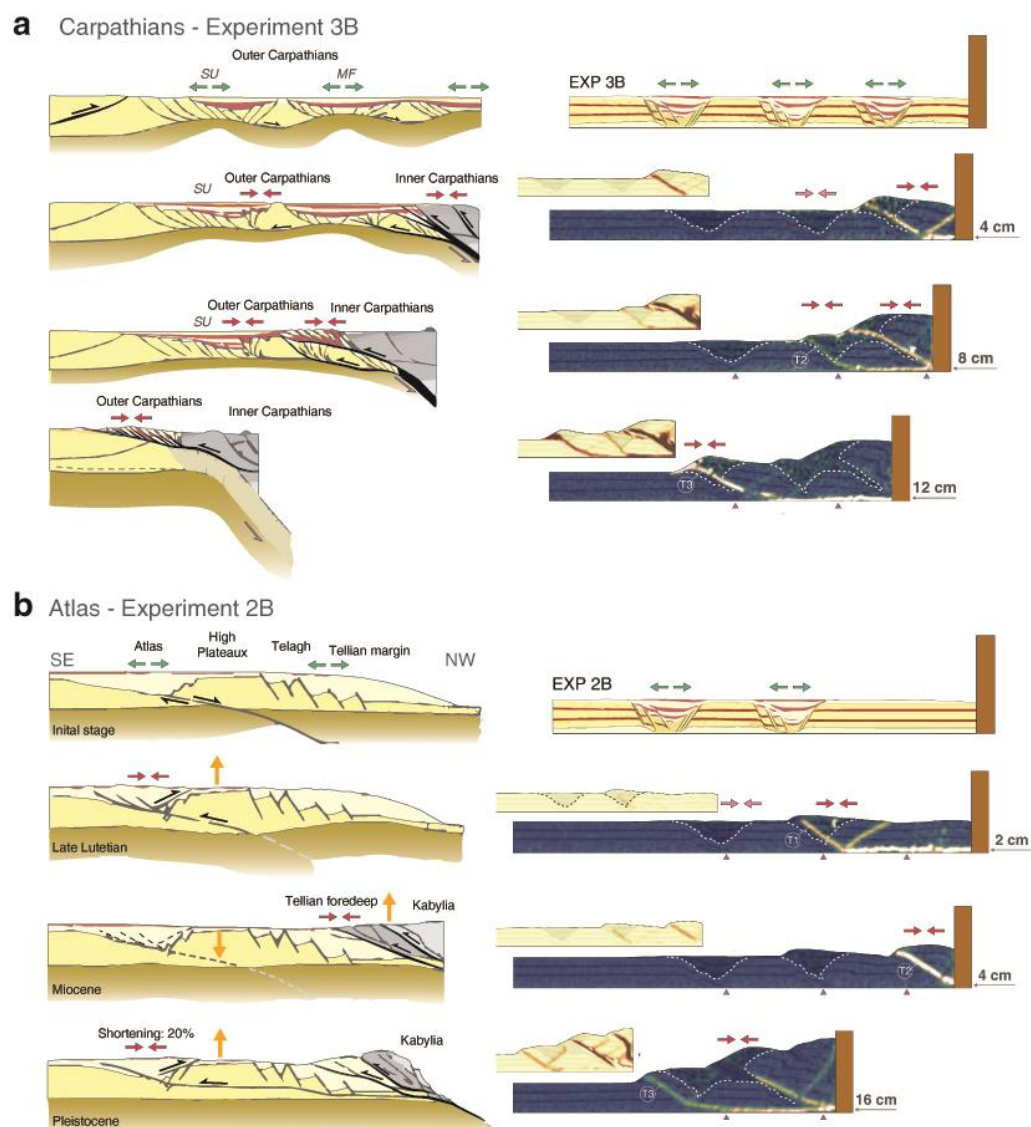

Figure 12. Temporal evolution comparison between selected natural examples and our analogue modelling results. (a) Carpathians vs EXP3B (redrawn from Picha et al., 2006). MF: Magura Flysch, SU: Silesian Unit. (b) Atlas vs EXP2B (redrawn from Bracene & de Lamotte, 2002)

865

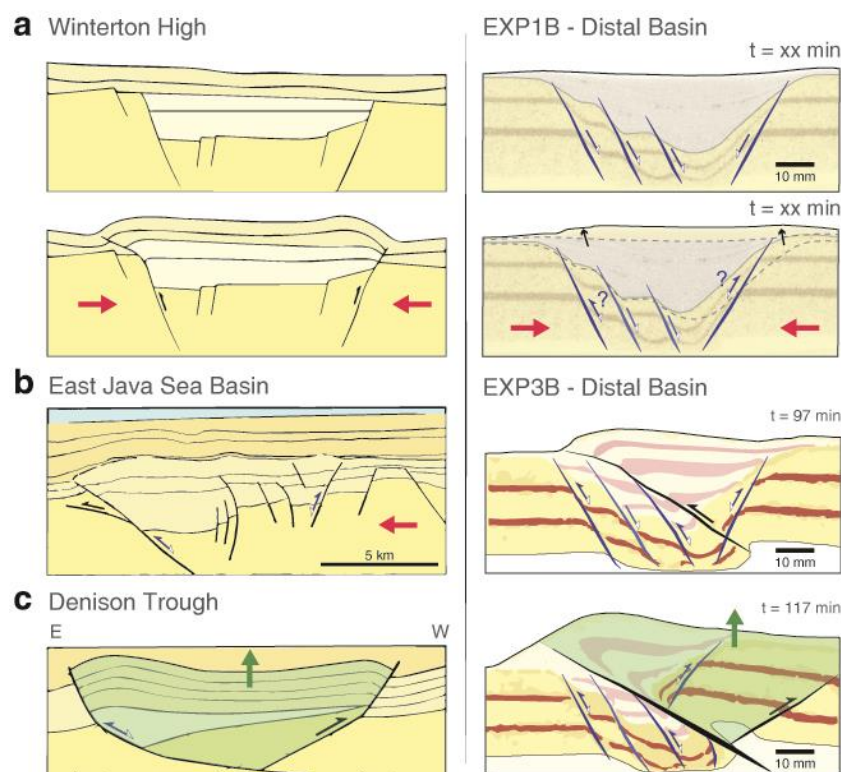

Figure 13. Side by side comparison between selected natural examples and small-scale observations from experimental results. (a) Winterton High and EXP1B distal basin. (b) East Java Sea Basin and EXP3B distal basin, early stages. (c) Denison Trough and EXP3B distal basin, late stages. Red arrows indicate compressional forces. Section highlighted in green in panel (c) indicates pop-up structures being uplifted during inversion.

870
